1  
2 **PrkA controls peptidoglycan biosynthesis through the essential phosphorylation of ReoM**

3  
4 **Sabrina Wamp<sup>a</sup>, Zoe J.Rutter<sup>b</sup>, Jeanine Rismondo<sup>a,c</sup>, Claire E. Jennings<sup>d</sup>, Lars Möller<sup>e</sup>,**  
5 **Richard J. Lewis<sup>b</sup> and Sven Halbedel<sup>a,\*</sup>**

6  
7 <sup>a</sup> FG11 - Division of Enteropathogenic bacteria and *Legionella*, Robert Koch Institute,  
8 Burgstrasse 37, 38855 Wernigerode, Germany;  
9 <sup>b</sup> Institute for Cell and Molecular Biosciences, Medical School, University of Newcastle,  
10 Catherine Cookson Building, Framlington Place, Newcastle upon Tyne NE2 4HH, UK  
11 NE2 4HH, United Kingdom;  
12 <sup>c</sup> Department of General Microbiology, GZMB, Georg-August-Universität Göttingen,  
13 Grisebachstraße 8, 37077 Göttingen, Germany;  
14 <sup>d</sup> Newcastle Drug Discovery, Northern Institute for Cancer Research, Paul O’Gorman Building,  
15 Medical School, Framlington Place, Newcastle upon Tyne NE2 4HH, UK.  
16 <sup>e</sup> ZBS 4 - Advanced Light and Electron Microscopy, Robert Koch Institute, Seestraße 10, 13353  
17 Berlin, Germany;

18  
19 \* Corresponding author:

20 [halbedels@rki.de](mailto:halbedels@rki.de), Robert Koch Institute, FG11 - Division of Enteropathogenic bacteria and  
21 *Legionella*, Burgstrasse 37, 38855 Wernigerode, Germany; phone: +49-30-18754-4323; fax: +49-  
22 30-18754-4207;

23  
24 Keywords: PASTA-domain, serine/threonine protein kinase, peptidoglycan, protein degradation,  
25 ClpCP protease

26

27

28 **ABSTRACT**

29

30 Peptidoglycan (PG) is the main component of bacterial cell walls and the target for many

31 antibiotics. PG biosynthesis is tightly coordinated with cell wall growth and turnover, and many

32 of these control activities depend upon PASTA-domain containing eukaryotic-like

33 serine/threonine protein kinases (PASTA-eSTK) that sense PG fragments. However, only a few

34 PG biosynthetic enzymes are direct kinase substrates. Here, we identify the conserved ReoM

35 protein as a novel PASTA-eSTK substrate in the Gram-positive pathogen *Listeria*

36 *monocytogenes*. Our data show that the phosphorylation of ReoM is essential as it controls

37 ClpCP-dependent proteolytic degradation of the essential enzyme MurA, which catalyses the first

38 committed step in PG biosynthesis. We also identify ReoY as a second novel factor required for

39 degradation of ClpCP substrates. Collectively, our data imply that the first committed step of PG

40 biosynthesis is activated through control of ClpCP protease activity in response to signals of PG

41 homeostasis imbalance.

42

43 **INTRODUCTION**

44

45 The cell wall of Gram-positive bacteria is a complicated three-dimensional structure that engulfs

46 the cell as a closed sacculus. The main component of bacterial cell walls is peptidoglycan (PG), a

47 network of glycan strands crosslinked together by short peptides (1). PG biosynthesis starts with

48 the conversion of UDP-GlcNAc into lipid II, a disaccharide pentapeptide that is ligated to a

49 membrane-embedded bactoprenol carrier lipid (2). This monomeric PG precursor is then flipped

50 from the inner to the outer leaflet of the cytoplasmic membrane by MurJ- and Amj-like enzymes

51 called flippases (3-5). Glycosyltransferases belonging either to the bifunctional penicillin binding

52 proteins (PBPs) or the SEDS (shape, elongation, division and sporulation) family, then transfer

53 the disaccharide pentapeptides to growing PG strands, which are finally crosslinked by a

54 transpeptidation reaction catalysed by monofunctional (class B) or bifunctional (class A) PBPs

55 (6-9). Numerous hydrolytic or PG-modifying enzymes are also required to adapt the sacculus to

56 the morphological changes that occur during bacterial cell growth and division (10, 11) or to alter

57 its chemical properties for instance for immune evasion (12). A suite of regulators ensure that

58 spatiotemporal control of PG synthesis is balanced against PG hydrolysis in cycles of bacterial

59 growth and division (13).

60 The activity of several key enzymes along the PG biosynthetic pathway is regulated by PASTA

61 (PBP and serine/threonine kinase associated) domain-containing ekaryotic-like serine/threonine

62 protein kinases (PASTA-eSTKs) (14-16). These membrane-integral enzymes comprise a

63 cytoplasmic kinase domain linked to several extracellular PASTA domains (15). These proteins

64 are stimulated by free muropeptides and lipid II (that accumulate during damage and turnover of

65 PG) on interaction with their PASTA domains (17-19). PknB, a representative PASTA-eSTK

66 from *Mycobacterium tuberculosis*, phosphorylates GlmU, a bifunctional

67 uridyltransferase/acetyltransferase important for synthesis of UDP-GlcNAc, and in so doing  
68 reduces GlmU activity (20). *M. tuberculosis* MviN, a MurJ-like flippase, is also a substrate of  
69 PknB and, in its phosphorylated state, P-MviN is inhibited by its binding partner, FhaA (21). *M.*  
70 *tuberculosis* PknB also phosphorylates both the class A PBP PonA1 (22) and the amidase-like  
71 PG-hydrolase CwlM, which is essential for growth (23-25). CwlM is membrane-associated and  
72 interacts with MurJ to control lipid II export (25). However, when phosphorylated, P-CwlM re-  
73 locates from the membrane to the cytoplasm (25) where it allosterically activates MurA 20–40-  
74 fold (24). MurA catalyzes the first committed step of PG biosynthesis by transferring an  
75 enoylpyruvate moiety to UDP-GlcNAc; MurA is essential in *M. tuberculosis* and in many other  
76 bacterial species tested (26-29). Finally, the *Listeria monocytogenes* PASTA-eSTK, PrkA,  
77 phosphorylates YvcK, which is required for cell wall homeostasis in a so far unknown way (30).  
78 Numerous additional proteins acting to coordinate cell wall biosynthesis with cell division are  
79 substrates of PASTA-eSTKs in other Gram-positive bacteria (15), including the late cell division  
80 protein GpsB of *Bacillus subtilis* (31, 32). We have shown previously that GpsB from *L.*  
81 *monocytogenes* is important for the last two steps of PG biosynthesis, *i. e.* transglycosylation and  
82 transpeptidation, by providing an assembly platform for the class A PBP, PBP A1 (33-36), and  
83 this adaptor function of GpsB is maintained in at least *B. subtilis* and *Streptococcus pneumoniae*  
84 (35). An *L. monocytogenes*  $\Delta$ *gpsB* mutant is impaired in PG biosynthesis and cannot grow at  
85 elevated temperatures (33), but this phenotype is readily corrected by a suppressor mutation,  
86 which mapped to *clpC* (29). ClpC is the ATPase subunit of the ClpCP protease that degrades  
87 substrate proteins upon heat stress (37). MurA (*aka* MurAA in *B. subtilis*) is a ClpCP substrate in  
88 both *B. subtilis* and *L. monocytogenes* (27, 29) and strongly accumulates in a *L. monocytogenes*  
89  $\Delta$ *clpC* mutant (29). Thus, a deficiency in the final two enzymatic steps of PG biosynthesis in the

90 absence of GpsB is corrected by mutations in *clpC* that increase the amount of the first enzyme of  
91 the same PG biosynthetic pathway.

92 We here have isolated further *gpsB* suppressor mutations affecting previously unstudied *Listeria*  
93 genes. We demonstrate that these proteins control the ClpCP-dependent degradation of MurA in  
94 a PrkA-dependent and hitherto unprecedented manner. One of them is phosphorylated by PrkA  
95 and this phosphorylation is essential. Our results represent the first molecular link between PrkA-  
96 dependent protein phosphorylation and control of PG production in low G/C Gram-positive  
97 bacteria and explain how PG biosynthesis is adjusted in these bacteria to meet PG production and  
98 repair needs.

99

100

## RESULTS

101

### 102 ***gpsB* suppressor mutations in the *lmo1503* (*reoM*) and *lmo1921* (*reoY*) genes**

103 A *L. monocytogenes*  $\Delta$ *gpsB* mutant is unable to replicate at 42°C, but readily forms suppressors  
104 correcting this defect (29). Previously isolated *gpsB* suppressors carried a mutation in the *clpC*  
105 gene, important for the stability of the UDP-*N*-acetylglucosamine 1-carboxyvinyltransferase  
106 MurA (29). We have characterized three more *shg* (suppression of heat sensitive growth)  
107 suppressor mutants (*shg8*, *shg10* and *shg12*) isolated from a  $\Delta$ *gpsB* mutant incubated on a BHI  
108 agar plate at 42°C. These three *shg* strains grew as fast as the wild type when cultivated at 37°C  
109 or 42°C, whereas the parental  $\Delta$ *gpsB* mutant grew at a reduced rate at 37°C and did not grow at  
110 42°C (Fig. 1A-B), as shown previously (33).

111 Sequencing of the *shg8*, *shg10* and *shg12* genomes identified one SNP in each strain that was  
112 absent from the parental  $\Delta$ *gpsB* mutant. Strain *shg8* carried a mutation in the uncharacterized  
113 *lmo1921* gene (herein named *reoY*, see below) that exchanged H87 into tyrosine; the same gene  
114 was affected by the introduction of a premature stop codon after the 73<sup>rd</sup> *reoY* codon in strain  
115 *shg10*. Strain *shg12* carried a mutation in the ribosomal binding site (RBS) of the *lmo1503* gene  
116 (renamed *reoM*), encoding an IreB-like protein, the function of which is not understood (38).

117 Whether the mutation in the RBS of *reoM* in strain *shg12* affected *reoM* expression, was not  
118 clear. Therefore, the *reoM* gene was deleted from the genome of the wild type and the  $\Delta$ *gpsB*  
119 mutant. While deletion of *reoM* had no effect on growth of wild type bacteria, it completely  
120 suppressed the growth defects of the  $\Delta$ *gpsB* mutant at both 37°C and 42°C (Fig. 1C-D). It is thus  
121 likely that the mutation in the *reoM* RBS impairs its expression. Likewise, deletion of *reoY*  
122 completely restored growth of the  $\Delta$ *gpsB* mutant at both temperatures (Fig. 1C-D).

123 Expression of an additional, plasmid-borne copy of *reoM* impaired growth of the  $\Delta gpsB$  mutant  
124 without affecting the growth of wild type bacteria, whilst expression of a second copy of *reoY*  
125 had no effect (Fig. S1A,B). The expression of *reoM* is thus inversely correlated with the growth  
126 of the  $\Delta gpsB$  mutant. Finally, the physiology of the  $\Delta reoM$  and  $\Delta reoY$  mutants was examined;  
127 their cell lengths were wild type-like and unaffected by the presence or absence of *gpsB*,  
128 suggesting the absence of cell division defects in the  $\Delta reoM$  or  $\Delta reoY$  mutants (Fig. S2A,B).  
129 Scanning electron micrographs of  $\Delta reoM$  and  $\Delta reoY$  single mutants revealed that these bacteria  
130 had a normal rod-shape, but that the  $\Delta gpsB \Delta reoM$  and  $\Delta gpsB \Delta reoY$  double mutants were  
131 partially bent (Fig. S2C), implying the presence of some shape maintenance defects along the  
132 lateral cell cylinders.

133

#### 134 **ReoM and ReoY affect the stability of MurA**

135 Suppression of the  $\Delta gpsB$  phenotype can be achieved by the accumulation of MurA (29).  
136 Consequently, MurA levels were determined in  $\Delta reoM$  and  $\Delta reoY$  mutant strains by Western  
137 blotting. MurA accumulated by at least eight-fold in comparison to the wild type in the absence  
138 of *reoM* or *reoY* (Fig. 2A), and reached similar levels to a mutant lacking *clpC*, which encodes  
139 the ATPase subunit of the ClpCP protease (Fig. 2A). MurAA, the *B. subtilis* MurA homologue, is  
140 degraded by the ClpCP protease *in vivo* (27). In order to test whether *reoM* and *reoY* exert their  
141 effect on MurA in a ClpC-dependent manner in *L. monocytogenes*, MurA levels were determined  
142 in  $\Delta clpC \Delta reoM$  and  $\Delta clpC \Delta reoY$  double mutants. The MurA levels in  $\Delta clpC$ ,  $\Delta reoM$  and  $\Delta reoY$   
143 single mutants were the same as in  $\Delta clpC \Delta reoM$  and  $\Delta clpC \Delta reoY$  double mutant strains (Fig.  
144 2B). Likewise, the MurA level in a mutant lacking *murZ*, previously shown to contribute to  
145 MurA stability (29), is not additive to the MurA level in  $\Delta clpC$  cells (Fig. 2B). Therefore, ReoM,  
146 ReoY and MurZ likely affect the ClpCP-dependent degradation of MurA. Combinations of

147  $\Delta$ reoM,  $\Delta$ reoY and  $\Delta$ murZ deletions did also not exert any additive effect on accumulation of  
148 MurA (Fig. S3A,B), further validating the conclusion that these genes all belong to the same  
149 pathway.

150 We then tested the hypothesis that ReoM and ReoY control proteolytic stability of MurA and  
151 followed MurA and DivIVA degradation over time in cells that had been treated with  
152 chloramphenicol to block protein biosynthesis. MurA was almost completely degraded in wild  
153 type cells 80 min after chloramphenicol treatment (Fig. 2C), whereas DivIVA was stable (Fig.  
154 S4). By contrast, no MurA degradation was observed in mutants lacking *clpC*, *reoM* or *reoY* (Fig.  
155 2C), which together demonstrates that ReoM and ReoY are as important for MurA degradation as  
156 is ClpC.

157

### 158 **The effect of ReoM and ReoY on MurA levels is conserved**

159 Homologues of the 90-residue ReoM protein are found across the entire Firmicute phylum, and  
160 include IreB, a substrate of the protein serine/threonine kinase IreK and its cognate phosphatase  
161 IreP from *Enterococcus faecalis* (38), whereas ReoY homologues are present only in the *Bacilli*  
162 and a *reoY* homologue has been identified as a  $\Delta$ *ireK* suppressor in *E. faecalis* (39), but the  
163 function of both *E. faecalis* remains unknown. In *B. subtilis*, ReoM corresponds to YrzL (e-value  
164  $3e^{-29}$ ) and ReoY to YpiB ( $4e^{-61}$ ), but neither protein has been studied thus far. To assess whether  
165 YrzL and YpiB were also crucial for control of MurAA levels in *B. subtilis*, cellular protein  
166 extracts from *B. subtilis*  $\Delta$ *yrzL* and  $\Delta$ *ypiB* mutants were probed by Western blot (Fig. 2D).  
167 MurAA accumulated by at least 12-fold in these strains in comparison to the wild type.  
168 Furthermore, the amount of MurAA was also increased by 12-fold in the  $\Delta$ *clpC* mutant. Taken  
169 together, these data indicate that ReoM and ReoY functions are conserved in both species. We



170 thus propose to rename *lmo1503* (*yrzL*) as *reoM* (regulator of MurA(A) degradation) and  
171 analogously *lmo1921* (*ypiB*) as *reoY*.

172 Several other ClpC substrates are known in *B. subtilis*, including the glutamine fructose-6-  
173 phosphate transaminase GlnS and the acetolactate synthase subunit IlvB (40). The levels of both  
174 proteins were also significantly increased in *B. subtilis*  $\Delta$ *reoM* and  $\Delta$ *reoY* mutants (Fig. S5),  
175 indicating that ReoM and ReoY are required for degradation of ClpC substrates in general.

176

### 177 **ReoM and ReoY contribute to PG biosynthesis**

178 In order to test whether MurA accumulation affected PG production, we tested the effect of  
179 enhanced MurA levels on resistance of *L. monocytogenes* against the cephalosporine antibiotic  
180 ceftriaxone. Artificial overproduction of MurA in strain LMJR116, which carries an IPTG-  
181 inducible *murA* gene in addition to the native copy on the chromosome, lead to a 12-fold increase  
182 of ceftriaxone resistance, while MurA depletion lowered ceftriaxone resistance (Tab. 1.). MurA  
183 levels are thus directly correlated with PG production, presumably leading to stimulation or  
184 impairment of PG biosynthesis during overproduction and depletion, respectively. In good  
185 agreement with the overproduction of MurA, ceftriaxone resistance of the  $\Delta$ *clpC* mutant  
186 increased to the same degree as when MurA was overproduced (Tab. 1). Ceftriaxone resistance  
187 of  $\Delta$ *reoM*,  $\Delta$ *reoY* and  $\Delta$ *murZ* mutants increased two- to three-fold (Tab. 1); this intermediate  
188 resistance level is probably explained by the presence of functional ClpCP in these strains.  
189 Nevertheless, these observations are consistent with a function of ReoM, ReoY and MurZ as  
190 regulators of ClpCP-dependent MurA degradation. Taken together, these results show that  
191 modulation of MurA levels effectively controls PG biosynthesis and also demonstrate that ReoM,  
192 ReoY and MurZ play an important role in its regulation.

193

194 **Phosphorylation and dephosphorylation of ReoM by PrkA and PrkP *in vitro***

195 PrkA (encoded by *lmo1820*) and PrkP (*lmo1821*) are the *L. monocytogenes* homologs of *E.*  
196 *faecalis* IreK and IreP, respectively. Consequently, the pairwise interactions and biochemical  
197 properties of ReoM, the PrkA kinase domain (PrkA-KD) and the cognate phosphatase PrkP were  
198 investigated. All isolated proteins electrophoresed as single species in non-denaturing PAGE  
199 (lanes 1, 2, Fig. 3A; lanes 1-4, Fig. 3B). When ReoM was incubated with PrkA-KD, in the  
200 absence of ATP, a slower migrating species was observed and the individual bands  
201 corresponding to ReoM and PrkA-KD disappeared indicating that the slower migrating species  
202 was a ReoM:PrkA-KD complex (lane 3, Fig. 3A). When ReoM was incubated with PrkA-KD and  
203 Mg/ATP under the same conditions, free PrkA-KD was observed but no bands equivalent to  
204 ReoM and the ReoM:PrkA-KD complex remained; instead a new species was present, migrating  
205 faster in the gel than ReoM (lane 4, Fig. 3A), which is likely to be phosphorylated ReoM (P-  
206 ReoM). Intact protein liquid chromatography-mass spectrometry (LC-MS) analysis of ReoM  
207 isolated from PrkA-KD after phosphorylation revealed the addition of 79.9 Da in comparison to  
208 the mass of ReoM (10671.5 Da), which corresponds to the formation of a singly-phosphorylated  
209 ReoM product of 10751.4 Da (Fig. 3C, Fig. S6). MS/MS spectra obtained during peptide mass  
210 fingerprinting were also consistent with one phosphorylation event per protein chain: the mass of  
211 one ReoM peptide, spanning residues Asp5 to Lys22 with mass of 2151.89 Da, was increased by  
212 79.96 Da after incubation with PrkA-KD and Mg/ATP. Analysis of the *y*- and *b*- ions in the  
213 MS/MS fragmentation spectrum of this peptide was consistent only with Thr7 as the sole  
214 phosphosite in ReoM (Fig. 3D). Finally, mutation of Thr7 to alanine completely abrogated the  
215 phosphorylation of ReoM by PrkA-KD when analysed by LC-MS (Fig. S7).

216 The ability of PrkP, the partner phosphatase to PrkA in *L. monocytogenes*, to interact with and  
217 remove phosphoryl groups from PrkA-KD and P-ReoM was also tested *in vitro*. PrkA and

218 purified P-ReoM were each incubated with PrkP in the absence and presence of  $MnCl_2$ , since  
219 divalent cations are essential co-factors for the PPM phosphatase family to which PrkP belongs  
220 (41), and the products were analysed by non-denaturing PAGE. Unlike the situation with ReoM  
221 and PrkA-KD, no stable protein:protein complexes were formed either in the presence or absence  
222 of endogenous  $MnCl_2$  (Fig. 3B). The incubation of P-ReoM with PrkP and manganese resulted in  
223 the almost complete disappearance of the band corresponding to P-ReoM (lane 6, Fig. 3B) in  
224 comparison to the same reaction conducted without the addition of  $MnCl_2$  (lane 5, Fig. 3B). The  
225 new band, corresponding to ReoM alone in lane 6, is masked by that for PrkP which migrates  
226 similarly to ReoM (lanes 1 and 4, Fig. 3B) under these electrophoresis conditions. The presence  
227 of unphosphorylated ReoM and the absence of P-ReoM was confirmed by LC-MS (Fig. S8).  
228 When incubated with PrkP in the presence of manganese ions, the band for PrkA-KD  
229 electrophoresed more slowly than for PrkA-KD in isolation (lanes 3 and 8, Fig. 3B), indicating  
230 that PrkA-KD had been dephosphorylated by PrkP. LC-MS analysis of PrkA-KD that had been  
231 incubated with PrkP/ $MnCl_2$  yielded a single major species of 37,413.2 Da, consistent with the  
232 predicted mass of the expressed recombinant construct, and the absence of a peak corresponding  
233 to phosphorylated PrkA-KD, P-PrkA-KD (Fig. S9). Therefore, PrkA-KD is capable of  
234 autophosphorylation even when expressed in a heterologous host, consistent with previous  
235 observations made for similar PASTA-eSTKs from other Gram-positive bacteria (42, 43).  
236 Finally, in the absence of  $MnCl_2$  no change in electrophoretic mobility was observed for P-PrkA-  
237 KD (lane 7, Fig. 3B).

238

### 239 **Phosphorylation of ReoM at threonine 7 is essential for viability**

240 PrkA phosphorylates ReoM on Thr7 and PrkP reverses this reaction *in vitro*; ReoM  
241 phosphorylation at Thr7 *in vivo* has also been observed by phosphoproteomics (44). In the

242 absence of molecular details on the impact of Thr7 phosphorylation we determined the  
243 importance of this phosphorylation *in vivo* by engineering a phospho-ablative T7A exchange in  
244 an IPTG-inducible allele of *reoM* and introduced it into the  $\Delta$ *reoM* mutant background. Deletion,  
245 depletion or expression of wildtype *reoM* had no effect on growth in strains LMSW30 ( $\Delta$ *reoM*)  
246 and LMSW57 (*ireoM*, i - is used to denote IPTG-dependent alleles throughout the manuscript) at  
247 37°C. Likewise, strain LMSW52 (*ireoM T7A*) grew normally in the absence of IPTG. However,  
248 the *reoM* mutant with the T7A mutation did not grow at all in the presence of IPTG, when  
249 expression of the phospho-ablative *reoM T7A* allele was induced (Fig. 4A), suggesting that  
250 phosphorylation of ReoM at Thr7 is essential for the viability of *L. monocytogenes*. Since ReoM  
251 influences the proteolytic stability of MurA, we determined the cellular amount of MurA in  
252 strains expressing the T7A variant of ReoM. For this purpose, strains LMSW57 (*ireoM*) and  
253 LMSW52 (*ireoM T7A*) were initially cultivated in plain BHI broth. At an OD<sub>600</sub> of 0.2, IPTG was  
254 added to a final concentration of 1 mM and cells were harvested 2 hours later. Strain LMSW57  
255 (*ireoM*) showed  $\Delta$ *clpC*-like MurA accumulation (around seven-fold in this experiment) when  
256 cultured in the absence of IPTG, but MurA was present at wild type levels in the presence of  
257 IPTG (Fig. 4C). The strain with the T7A exchange also accumulated MurA to a  $\Delta$ *clpC*-like extent  
258 in the absence of IPTG. However, around 10% of the wild type MurA levels could be detected in  
259 cells expressing the *reoM T7A* allele (Fig. 4C). These data demonstrate that Thr7 in ReoM is of  
260 special importance for the proteolytic stability of MurA. In agreement with these results, IPTG  
261 was toxic for the *ireoM T7A* mutant in a disc diffusion assay and rendered this strain  
262 hypersensitive to ceftriaxone (Fig. 4D).

263

264

265

## 266 **Lethality of the *reoM T7A* mutations depends on ClpC**

267 That MurA is rapidly degraded in cells expressing *reoM T7A* implies that  
268 phosphorylation/dephosphorylation of ReoM at Thr7 controls ClpCP-dependent MurA  
269 degradation. MurA is an essential enzyme in *L. monocytogenes* (29), and stimulation of ClpCP-  
270 dependent MurA degradation in the *reoM T7A* mutant would provide an explanation for the  
271 lethality of this mutation. In order to address this possibility, we deleted *clpC* in the conditional  
272 *ireoM T7A* background. This strain grew even in the presence of IPTG, a compelling  
273 demonstration that the removal of *clpC* suppressed the lethality of the *reoM T7A* mutation (Fig.  
274 4B). MurA also accumulated to the same degree as in the  $\Delta clpC$  mutant in this strain (Fig. 4C),  
275 suggesting that inactivation of the ClpCP-dependent degradation of MurA overcame the lethal  
276 effect of the T7 mutation in *reoM* and this suggests that ClpCP acts downstream of ReoM. We  
277 next wondered whether deletion of *reoY* and *murZ* would have a similar effect and deleted these  
278 genes in the *reoM T7A* mutant. As can be seen in Fig. 4E, deletion of either gene overcame the  
279 lethality of *reoM T7A*, indicating that ReoY and MurZ must also act downstream of ReoM.

280

## 281 **Crystal structure of ReoM, a homologue of *Enterococcus faecalis* IreB**

282 Purified ReoM yielded crystals that diffracted to a maximum resolution of 1.6 Å. The NMR  
283 structure of IreB (PDBid 5US5) (45) was used to solve the structure of ReoM by molecular  
284 replacement (Fig. 5A). The data collection and refinement statistics for the ReoM structure are  
285 summarised in Tab. 2. ReoM shares the same overall fold as IreB (45), each containing a  
286 compact 5-helical bundle (4 standard  $\alpha$ -helices and one single-turned  $3_{10}$ -helix between residues  
287 52 and 54) with short loops between the secondary structure elements, which are defined above  
288 the sequence alignment in Fig. 5B. Other than IreB (45), there are no structural homologues of  
289 ReoM with functional significance in the PDB. The helical bundles in both ReoM and IreB

290 associate into homodimers with  $\alpha$ -helices two and four from each protomer forming the majority  
291 of the homodimer interface (Fig. 5A), and these residues are highlighted in Fig. 5B. In agreement  
292 with the IreB structural analysis, 1200  $\text{\AA}^2$  of surface area is buried in the ReoM dimer interface,  
293 representing 9% of the total solvent accessible surface area. The similarity of the monomers and  
294 the dimeric assemblies of ReoM and IreB is underlined by the 1.5 and 1.7  $\text{\AA}$  r.m.s.d. values,  
295 respectively, on global secondary structure superposition matching 74  $C\alpha$  atoms from each  
296 protomer in the comparison.

297 Other than the compact helical bundle of ReoM, there is a ~16 residue-long N-terminal tail, with  
298 B-factors 25% higher than the rest of the protein, prior to the start of  $\alpha$ -helix 1 at residue Ile17.  
299 The equivalent N-terminal region is also disordered in the NMR structure of IreB (45). Despite  
300 the absence of secondary structure, the ReoM model covering this region could be built with  
301 confidence from Asp5 in chain A and Asp2 in chain B (Fig. 5C). Consequently, it is possible to  
302 visualise Thr7, the target for phosphorylation by PrkA, in the flexible N-terminal region in both  
303 chains. The side chain of Thr7 in both chains makes no intramolecular interactions and is thus  
304 amenable to phosphorylation by PrkA. The extended N-terminal regions are at least partially  
305 stabilised by crystal lattice interactions that, in chain B, include Phe9 and Tyr10 forming a  
306 network of hydrophobic interactions with other aromatic residues from symmetry equivalent  
307 molecules, including contributions from another copy of Phe9 and Tyr10. Phosphorylation could  
308 force a change in oligomeric state, as observed quite commonly in response regulators in order to  
309 bind more effectively to promoter regions to effect transcription (46). However, analysis of the  
310 oligomeric state of P-ReoM by size exclusion chromatography revealed that the protein behaved  
311 in solution the same as to unphosphorylated ReoM (Fig. S10).

312 Unlike the packing arrangement of Thr7 in chain B, the local symmetry surrounding Thr7 in  
313 chain A might provide some information of potential functional significance to the

314 phosphorylated form of ReoM. Here, a sulphate ion (a component of the crystallisation reagent)  
315 is hydrogen bonded to the sidechain of Thr7 and hence mimics, to some degree, what the  
316 phosphorylated protein may look like (Fig. 5C). The sulphate ion is captured by a positively-  
317 charged micro-environment incorporating residues Lys35, Arg57, His58 and Arg62 from a  
318 symmetry-equivalent molecule. ReoM could react to phosphorylation on Thr7 by a substantial  
319 movement of the N-terminal tail to interact with conserved, positively-charged amino acids on  
320 the protein surface. We identified a single cluster of arginines (Arg57 [57% conserved], Arg62  
321 [99%], Arg66 [76%], Arg70 [98%]) in close spatial proximity with levels of conservation  
322 amongst all 2909 ReoM homologues present at NCBI approaching that of Thr7 (96%.) and  
323 replaced them by alanines. Whereas the R66A and R70A mutations were without any effect on  
324 growth (data not shown), expression of ReoM R57A and R62A mutations were as lethal as  
325 expression of ReoM T7A (Fig. S11). Thus, Arg57 and Arg62 might co-ordinate P-Thr7,  
326 stabilising the conformation and position of the flexible N-terminal region (Fig. S12). Despite  
327 multiple attempts, however, no crystals of P-ReoM could be grown and the molecular  
328 consequences of ReoM phosphorylation remain to be determined.

329  
330 **Control of MurA stability and PG biosynthesis by the PrkA/PrkP protein**  
331 **kinase/phosphatase pair**

332 To study the contribution of the PrkA/PrkP couple to PG biosynthesis in more detail, we aimed to  
333 construct *prkA* and *prkP* deletion mutants, but failed to delete *prkA*. However, *prkA* could be  
334 deleted in the presence of an IPTG-inducible ectopic *prkA* copy and the resulting strain  
335 (LMSW84) required IPTG for growth (Fig. 6A), demonstrating the essentiality of this gene. The  
336 essentiality of *prkA* in our hands is consistent with results by others who have also shown that  
337 *prkA* can only be inactivated in the presence of a second copy (47). Repeated attempts to delete

338 *prkP* finally yielded a single  $\Delta prkP$  clone (LMSW76). Genomic sequencing of this strain, which  
339 grew at a similar rate to wild type (Fig. 6A), confirmed the successful deletion of *prkP* but also  
340 identified a trinucleotide deletion in the *prkA* gene (designated *prkA\**), effectively removing the  
341 complete codon of Gly18 that is part of a conserved glycine-rich loop important for ATP binding  
342 (48). Presumably, this mutation reduces the PrkA kinase activity to balance the absence of PrkP.  
343 By contrast, *prkP* could be deleted readily in the presence of a second IPTG-dependent copy of  
344 *prkP* and growth of the resulting strain (LMSW83) did not require IPTG, most likely explained  
345 by promoter leakiness in the absence of IPTG (Fig. 6A). The viability of the *iprkP* mutant shows  
346 that the *prkP* deletion had no polar effects on the expression of the downstream *prkA*. That *prkA*  
347 and *prkP* are both essential suggests that some of their substrates must be phosphorylated and  
348 unphosphorylated, respectively, to be active. Next, the effect of *prkA* and *prkP* mutations on  
349 MurA accumulation was analyzed by Western blotting. Intermediate MurA accumulation was  
350 evident in the  $\Delta prkP prkA^*$  strain, while full accumulation of MurA was observed in PrkP-  
351 depleted cells. By contrast, no MurA was detected in cells depleted for PrkA (Fig. 6B).  
352 Therefore, PrkA and PrkP inversely contribute to the accumulation of MurA, suggesting that  
353 phosphorylated ReoM favors MurA accumulation, while un-phosphorylated ReoM counteracts  
354 this process. In good agreement, depletion of PrkA strongly increased ceftriaxone susceptibility,  
355 while inactivation of *prkP* caused increased ceftriaxone resistance (Tab. 1).

356

### 357 **Deletion of *reoM*, *reoY* or *clpC* eliminates *prkA* essentiality**

358 In order to test whether the essentiality of *prkA* could be explained by stimulated MurA  
359 degradation through ClpCP, we first tested the effect of *clpC* on the essentiality of *prkA*. For this  
360 purpose, *clpC* was removed from the *iprkA* strain and growth of the resulting strain (LMSW91)  
361 was tested. In contrast to the parental *iprkA* strain (LMSW84), which required IPTG for growth,



362 strain LMSW91 was viable without IPTG (Fig. 7A) thus confirming that the essentiality of PrkA  
363 depends on ClpC. We next wondered whether ReoM and ReoY were also required for PrkA  
364 essentiality and consequently deleted their genes from the *iprkA* background to test this. Again,  
365 the resulting strains did not require IPTG for growth in contrast to the parental *iprkA* strain (Fig.  
366 7A). In good agreement with these findings, deletion of *clpC*, *reoM* or *reoY* all stabilized MurA  
367 in PrkA-depleted cells (Fig. 7B), showing that the stimulated degradation of MurA that we  
368 observe in cells depleted for PrkA (Fig. 6B) is dependent on any one of these three proteins.  
369 These results together permit a model of genetic interactions to be proposed (Fig. 7C) that starts  
370 with PrkA and its downstream substrate ReoM. ReoY, MurZ and ClpC in turn are positioned  
371 downstream of ReoM (as indicated by the experiments shown in Fig. 4D) to control MurA  
372 stability. To further substantiate this concept, physical interactions between ReoM, ReoY, ClpC,  
373 ClpP and MurA were determined in bacterial two hybrid experiments, which revealed that ReoY  
374 interacted with ClpC, ClpP and ReoM. In turn, ReoM interacted with MurA (Fig. 7C, Fig. S13),  
375 which suggests that ReoM and ReoY could bridge the interaction of ClpCP with its substrate  
376 MurA.  
377

378 **DISCUSSION**

379

380 With ReoM we have identified a missing link in a regulatory pathway that enables Firmicute  
381 bacteria to activate PG biosynthesis under conditions damaging their cell walls. In *L.*  
382 *monocytogenes*, the sensory module of this pathway comprises the membrane integral protein  
383 kinase PrkA and the cognate protein phosphatase PrkP, their newly discovered substrate ReoM  
384 and the associated factors ReoY and MurZ, which together regulate ClpCP activity, the effector  
385 protease that acts on MurA (Fig. 8). It has been demonstrated previously that the kinase activity  
386 of PrkA homologues was activated by muropeptides (17, 49) or the PG precursor lipid II (18).  
387 Muropeptides were released from the cell wall during normal PG turnover, and their release was  
388 intensified when PG hydrolysis prevailed over PG biosynthesis (10, 50), whereas blocking PG  
389 chain elongation by moenomycin treatment caused the accumulation of lipid-linked PG  
390 precursors (51). Thus, both types of molecules accumulated when PG biosynthesis was inhibited  
391 and could represent useful signals for detecting cell wall-damaging situations. Our data are  
392 consistent with a model in which PrkA-phosphorylated ReoM no longer activates ClpCP, which  
393 leads to MurA stabilization and the activation of PG biosynthesis (Fig. 8). In *B. subtilis*, this  
394 effect is supported by stabilization of GlmS (Fig. S4A), another ClpCP substrate but which acts  
395 in front of MurA as the first enzyme of the UDP-GlcNAc-generating GlmSMU pathway.

396 How ReoM and ReoY exert their effect on ClpCP is currently unknown, but a fascinating  
397 possibility would be a function like to that of an adaptor protein to target protein substrates to  
398 ClpCP for degradation. Several ClpC adaptors for different substrates are known in *B. subtilis*  
399 (52, 53), but an adaptor for *BsMurAA* is not among them (27, 52). Like ReoM, the ClpC adaptor  
400 McsB from *B. subtilis* is also subject to phosphorylation, but - unlike ReoM - it targets its  
401 substrate CtsR to the ClpCP machinery only when phosphorylated (54). Either ReoM or ReoY

402 could act as this adaptor, leaving a subsidiary function for the other respective protein.  
403 Alternatively, both proteins could work in tandem, where each of them is equally needed for  
404 ClpCP-dependent MurA degradation since the phenotypes of *reoM* and *reoY* mutants were  
405 identical with respect to MurA stability. However, overexpression or deletion of *reoM* altered the  
406 phenotype of the  $\Delta$ *gpsB* mutant, but that of *reoY* was without phenotype (Fig. S1, Fig. S2).  
407 ReoY, restricted to the *Bacilli*, also showed a narrower phylogenetic distribution than ReoM,  
408 which is found across different Firmicutes (Fig. 5B). Thus, it seems that ReoM might have a  
409 more generalized role, whereas ReoY could play a subordinate function in control of MurA  
410 degradation by ClpCP. The role of the MurA homologue MurZ in this process is entirely unclear,  
411 but our genetic data now place it downstream of ReoM (Fig. 7C). Furthermore, arginine  
412 phosphorylation targets proteins to ClpCP for degradation (55). *L. monocytogenes* MurA contains  
413 17 arginines and MurAA of *B. subtilis* has been found in complex with the protein arginine  
414 phosphatase YwIE (56). The possibility that MurA proteins could also require arginine  
415 phosphorylation to be accepted as a substrate by ClpCP offers additional control possibilities for  
416 ReoM/ReoY/MurZ to modulate MurA levels.

417 A screen for *gpsB* suppressors in *S. pneumoniae* did not yield *reoM* mutations (and these strains  
418 do not contain *reoY*, consistent with a subordinate function for this gene), but instead suppressor  
419 mutations were found that affect *phpP*, which encodes a Ser/Thr protein phosphatase that acts in  
420 concert with StkP, the PASTA-eSTK of this organism (57, 58). Absence or inactivation of PhpP  
421 triggered an increase in StkP-dependent protein phosphorylation levels in the pneumococcus (57,  
422 59). It is tempting to speculate that loss of PhpP activity in this suppressor also triggers P-ReoM  
423 formation that, according to our model, would help to stabilize MurA and thus suppress the  
424  $\Delta$ *gpsB* phenotype. Interestingly, another *S. pneumoniae* *gpsB* suppressor was identified that  
425 carries a duplication of a ~150 kb genomic fragment (57), a region that includes the open reading

426 frame for MurA. Suppression of the *gpsB* phenotype in this instance could also work via MurA  
427 accumulation, but this time due to a gene dosage effect.

428 It is becoming increasingly evident that control of PG biosynthesis in response to cell wall  
429 derived signals, via PASTA-eSTKs, is a regulatory capacity common to Firmicutes and  
430 Actinobacteria. CwIM is the critical kinase substrate in the actinobacterium *M. tuberculosis* that,  
431 when phosphorylated by PknB, binds to and activates MurA (24). Homologues of CwIM are not  
432 present in *L. monocytogenes* or *B. subtilis* and instead these bacteria adjust their MurA levels by  
433 controlling MurA turnover in response to PrkA-dependent phosphorylation of ReoM.  
434 Consequently, both mechanisms activate PG biosynthesis in a PrkA-dependent manner either by  
435 activation or stabilization of MurA. Presumably *B. subtilis*, and other endospore forming bacteria,  
436 re-start PG biosynthesis at the onset of germination in a similar way. Germination of *B. subtilis*  
437 spores can be triggered by muropeptides in a manner that depends upon PrkC (49), the PASTA-  
438 eSTK of *B. subtilis* (60). Even though *BsPrkC* phosphorylates multiple substrates (61), whose  
439 individual contribution to germination is not known precisely, phosphorylation of ReoM (*aka*  
440 YrzL) could be required to restart PG biosynthesis in germinating *B. subtilis* cells by stabilizing  
441 MurAA. Moreover, an *E. faecalis* mutant lacking the PASTA-eSTK IreK was more susceptible  
442 to ceftriaxone but overexpression of *EfMurAA* overcame this defect (62). This implies the  
443 possibility that unphosphorylated IreB together with the ReoY homologue of this organism,  
444 OG1RF\_11272 (39), might stimulate MurAA proteolysis in *E. faecalis* as well. Taken together it  
445 seems that observations made in different Firmicutes are in good agreement with the  
446 PrkA→ReoM/ReoY→ClpC→MurA signaling sequence that we propose. The open questions  
447 that remain on the molecular mechanism of ClpCP control by ReoM and ReoY will be addressed  
448 by future experiments.

449

450 **MATERIALS AND METHODS**

451

452 **Bacterial strains and growth conditions**

453 Tab. 3 lists all strains used in this study. Strains of *L. monocytogenes* were cultivated in BHI  
454 broth or on BHI agar plates. *B. subtilis* strains were grown in LB broth at 37°C. Antibiotics and  
455 supplements were added when required at the following concentrations: erythromycin (5 µg/ml),  
456 kanamycin (50 µg/ml), X-Gal (100 µg/ml) and IPTG (as indicated). *Escherichia coli* TOP10 was  
457 used as host for all cloning procedures (63). Minimal inhibitory concentrations against  
458 ceftriaxone were determined as described previously (64) using E-test strips with a ceftriaxone  
459 concentration range of 0.016 - 256 µg/ml.

460

461 **General methods, manipulation of DNA and oligonucleotide primers**

462 Standard methods were used for transformation of *E. coli* and isolation of plasmid DNA (63).  
463 Transformation of *L. monocytogenes* was carried out as described by others (65). Restriction and  
464 ligation of DNA was performed according to the manufacturer's instructions. All primer  
465 sequences are listed in Tab. 4.

466

467 **Construction of plasmids for recombinant protein expression**

468 The plasmids for expressing recombinant versions of ReoM, PrkA-KD and PrkP were prepared  
469 by first amplifying the corresponding genes (*reoM*, *lmo1820* and *lmo1821*) from *L.*  
470 *monocytogenes* EGD-e genomic DNA using primer pairs Lmo1503F/Lmo1503R, PrkAF/PrkAR,  
471 and PrkPF/PrkPR, respectively. The PCR products were individually ligated between the *NcoI*  
472 and *XhoI* sites of pETM11 (66). All mutagenesis was carried out using the Quikchange protocol

473 and the correct sequence of each plasmid and mutant constructed was verified by Sanger DNA  
474 sequencing (Eurofins Genomics).

475

#### 476 **Construction of plasmids for generation of *L. monocytogenes* strains**

477 Plasmid pJR65 was constructed for the inducible expression of *reoM*. To this end, the *reoM* open  
478 reading frame was amplified by PCR using the oligonucleotides JR169/JR170 and cloned into  
479 pIMK3 using NcoI/SalI. The T7A mutation were introduced into *reoM* of plasmid pJR65 by  
480 quickchange mutagenesis using the primer pair SW77/SW78, yielding pSW29. The R57A, R62A  
481 R66A and R70A, mutations were introduced into pJR65 in the same way, but using primer pairs  
482 SW144/SW145, SW146/SW147, SW136/SW137 and SW138/SW139, respectively.

483 Plasmid pJR70 was constructed for inducible *reoY* expression. For this purpose, *reoY* was  
484 amplified using the primer pair JR163/JR164 and cloned into pIMK3 using NcoI/SalI.

485 Plasmid pSW38, for IPTG-inducible *prkA* expression, was constructed by amplification of *prkA*  
486 using the oligonucleotides SW112/SW113 and the subsequent cloning of the generated fragment  
487 into pIMK3 using BamHI/SalI. Plasmid pSW39, for IPTG-controlled expression of *prkP*, was  
488 constructed analogously, but using the oligonucleotides SW110/SW111 as the primers.

489 For construction of plasmid pJR83, facilitating deletion of *reoY*, fragments encompassing ~800  
490 bp up- and down-stream of *reoY* were amplified by PCR with the primer pairs JR197/JR198 and  
491 JR199/JR200. Both fragments were spliced together by splicing by overlapping extension (SOE)  
492 PCR and cloned into pMAD using BamHI/EcoRI.

493 Plasmid pJR126 was generated for deletion of *reoM*. Fragments up- and down-stream of *reoM*  
494 were PCR amplified using the primers JR264/JR265 and JR266/JR267, respectively. Both  
495 fragments were cut with BamHI, fused together by ligation and the desired fragment was

496 amplified from the ligation mixture by PCR using the primers JR264/JR267 and then cloned into  
497 pMAD using BglII/SalI.

498 Plasmid pSW36 was constructed to delete the *prkA* gene. Fragments up- and down-stream of  
499 *prkA* were amplified in separate PCRs using the primer pairs SHW819/SHW821 and  
500 SHW820/SHW822, respectively. Both fragments were fused together by SOE-PCR and inserted  
501 into pMAD by restriction free cloning (67). Plasmid pSW37, facilitating deletion of *prkP*, was  
502 constructed in a similar manner. Up- and down-stream fragments of *prkP* were amplified using  
503 the primer pairs SHW815/SHW817 and SHW816/SHW818 and fused together by SOE-PCR.  
504 The resulting fragment was inserted into pMAD by restriction free cloning.

505 Derivatives of pIMK3 were introduced into *L. monocytogenes* strains by electroporation and  
506 clones were selected on BHI agar plates containing kanamycin. Plasmid insertion at the *attB* site  
507 of the tRNA<sup>Arg</sup> locus was verified by PCR. Plasmid derivatives of pMAD were transformed into  
508 the respective *L. monocytogenes* recipient strains and genes were deleted as described elsewhere  
509 (68). All gene deletions were confirmed by PCR.

510

### 511 **Construction of bacterial two hybrid plasmids**

512 The *reoM* (JR255/JR256), *reoY* (JR253/JR254), *clpC* (SHW830/831) and *clpP* (SHW832/833)  
513 genes were amplified using the primer pairs given in brackets and cloned into pUT18, pUT18C,  
514 pKT25 and p25-N plasmids using XbaI/KpnI. The *murA* gene was amplified using the  
515 oligonucleotides JR249/JR250 for cloning into pKT25 and p25-N using PstI/KpnI or using the  
516 JR257/JR250 primer pair for cloning into pUT18 and pUT18C using the same restriction  
517 enzymes.

518

519

## 520 **Bacterial two hybrid experiments**

521 Plasmids carrying genes fused to T18- or the T25-fragments of the *Bordetella pertussis* adenylate  
522 cyclase were co-transformed into *E. coli* BTH101 (69) and transformants were selected on LB  
523 agar plates containing ampicillin (100  $\mu\text{g ml}^{-1}$ ), kanamycin (50  $\mu\text{g ml}^{-1}$ ), X-Gal (0.004%) and  
524 IPTG (0.1 mM). Agar plates were photographed after 48 h of incubation at 30°C.

525

## 526 **Genome sequencing**

527 A total of 1 ng of genomic DNA was used for library generation by the Nextera XT DNA Library  
528 Prep Kit according to the manufacturer's recommendations (Illumina). Sequencing was carried  
529 out on a MiSeq benchtop sequencer and performed in paired-end modes (2 x 300 bp) using a  
530 MiSeq Reagent Kit v3 cartridge (600-cycle kit). Sequencing reads were mapped to the reference  
531 genome *L. monocytogenes* EGD-e (NC\_003210.1) (70) by utilizing the Geneious software  
532 (Biomatters Ltd.). Variants, representing putative suppressor mutations, were identified using the  
533 Geneious SNP finder tool. Genome sequences of *shg8*, *shg10*, *shg12* and LMSW76 were  
534 deposited at ENA under study number PRJEB35110 and sample accession numbers ERS3927571  
535 (SAMEA6127277), ERS3927572 (SAMEA6127278), ERS3927573 (SAMEA6127279), and  
536 ERS3967687 (SAMEA6167687) respectively.

537

## 538 **Isolation of cellular proteins and Western blotting**

539 Cells were harvested by centrifugation (13,000 rpm, 1 min in a table-top centrifuge), washed with  
540 ZAP buffer (10 mM Tris.HCl pH7.5, 200 mM NaCl), resuspended in 1 ml ZAP buffer also  
541 containing 1 mM PMSF and disrupted by sonication. Centrifugation was used to remove cellular  
542 debris and the supernatant was used as total cellular protein extract. Sample aliquots were  
543 separated by standard SDS polyacrylamide gel electrophoresis. Gels were transferred onto



544 positively charged polyvinylidene fluoride membranes by semi-dry transfer. ClpC, DivIVA,  
545 GlmS, IlvB and MurA were immune-stained using a polyclonal rabbit antiserum recognizing *B.*  
546 *subtilis* ClpC (29), DivIVA (71), GlmS, IlvB (40) and MurAA (27) as the primary antibody and  
547 an anti-rabbit immunoglobulin G conjugated to horseradish peroxidase as the secondary one. The  
548 ECL chemiluminescence detection system (Thermo Scientific) was used for detection of the  
549 peroxidase conjugates on the PVDF membrane in a chemiluminescence imager (Vilber Lourmat).  
550 For depletion of PrkA, PrkA depletion strains were grown overnight in the presence of 1 mM  
551 IPTG and then again inoculated in BHI broth containing 1 mM IPTG to an  $OD_{600}=0.05$  and  
552 grown for 3 h at 37°C. Subsequently, cells were centrifuged, washed and reinoculated in BHI  
553 broth without IPTG at the same  $OD_{600}$  as before centrifugation. Finally, cells were harvested after  
554 3.5 more hours of growth at 37°C and cellular proteins were isolated.

555  
556 **Microscopy**  
557 Cytoplasmic membranes of exponentially growing bacteria were stained through addition of 1  $\mu$ l  
558 of Nile red solution (100  $\mu$ g ml<sup>-1</sup> in DMSO) to 100  $\mu$ l of culture. Images were taken with a Nikon  
559 Eclipse Ti microscope coupled to a Nikon DS-MBWc CCD camera and processed using the NIS  
560 elements AR software package (Nikon) or ImageJ. Scanning electron microscopy was performed  
561 essentially as described earlier (64).

562  
563 **Recombinant protein purification**  
564 All proteins were expressed in *E. coli* BL21 (DE3) cells. Cell cultures were grown at 37°C in LB  
565 liquid media supplemented with 50  $\mu$ g mL<sup>-1</sup> kanamycin to an  $OD_{600}$  0.6-0.8 before expression  
566 was induced by the addition of IPTG to a final concentration of 0.4 mM IPTG. The cultures were  
567 incubated at 20°C overnight before the cells from 2 L of cell culture were harvested by

568 centrifugation at 3500 x g for 30 minutes. The cell pellets were resuspended in 70 mL of buffer A  
569 (50 mM Tris.HCl, pH 8, 300 mM NaCl, 10 mM imidazole) with 500 Kunitz units of DNase I and  
570 1 mL Roche complete protease inhibitor cocktail at 25x working concentration. The cells were  
571 lysed by sonication, centrifuged at 19000 x g for 20 minutes and the supernatant was filtered  
572 using a 0.45 µm filter. The clarified cell lysate was loaded onto a 5 mL Ni-NTA superflow  
573 cartridge (Qiagen), washed with buffer A, and bound proteins were eluted with 50 mM Tris.HCl,  
574 pH 8, 300 mM NaCl, 250 mM imidazole. The His<sub>6</sub>-tag of PrkA-KD was cleaved with His-tagged  
575 TEV protease (1 mg TEV for 20 mg of protein) at 4 °C during an overnight dialysis against a  
576 buffer of 50 mM Tris.HCl, pH 8, 300 mM NaCl, 10 mM imidazole, 1 mM DTT; TEV cleavage  
577 of ReoM was conducted as above except the dialysis was carried out at 20 °C. The proteolysis  
578 reaction products were then passed over a 5 mL Ni-NTA superflow cartridge (Qiagen) to remove  
579 TEV and uncleaved protein. The proteins that did not bind to the Ni-NTA column were  
580 concentrated and loaded onto either a Superdex 75 XK16/60 (GE Healthcare) (ReoM) or a  
581 Superdex 200 XK16/60 (GE Healthcare) (PrkA-KD and PrkP) equilibrated with 10 mM Na-  
582 HEPES, pH 8, 100 mM NaCl for size exclusion chromatography. Fractions from the gel filtration  
583 were analysed for purity by SDS-PAGE, concentrated to 20-40 mg mL<sup>-1</sup>, and small aliquots were  
584 snap-frozen in liquid nitrogen for storage at -80°C.

585

### 586 **X-ray crystallography and ReoM structure determination**

587 For ReoM, 23 mg mL<sup>-1</sup> of protein in 10 mM Na-HEPES pH 8, 100 mM NaCl was subjected to  
588 crystallisation by sparse matrix screening using a panel of commercial crystallisation screens. 100  
589 and 200 nL drops of protein and 100 nL of screen solution were dispensed into 96 well MRC  
590 crystallization plates (Molecular Dimensions) by a Mosquito (TTP Labtech) liquid handling robot  
591 and the crystallisation plates were stored at a constant temperature of 20°C. The crystals that

592 grew and were subsequently used for diffraction experiments were formed in 0.1 M  
593 phosphate/citrate pH 4.2, 0.2 M lithium sulfate, 20 % w/v PEG 1000 from the JCSG + screen and  
594 were mounted onto rayon loops directly from the crystallization drops and cryo-cooled in liquid  
595 nitrogen.

596 Diffraction data were collected on beamline I03 at the Diamond Light Source (DLS) synchrotron.  
597 Diffraction images were integrated in MOSFLM (72) and scaled and merged with AIMLESS  
598 (73). The initial model was generated by molecular replacement in PHASER (74) using the  
599 dimeric, 20-conformer ensemble model (PDBid 5US5) of IreB solved by nuclear magnetic  
600 resonance (45) as a search model. The final model was produced by iterative cycles of model  
601 building in COOT (75) with refinement in REFMAC (76) until convergence. The diffraction data  
602 collection and model refinement statistics are summarised in Tab. 2.

603

#### 604 **Protein phosphorylation and dephosphorylation**

605 The effect of phosphorylation and dephosphorylation on ReoM and PrkA-KD proteins was  
606 analysed by 20% non-denaturing PAGE. Phosphorylation reactions consisted of 18.5  $\mu$ M ReoM,  
607 3.7  $\mu$ M PrkA-KD, 5 mM ATP and 5 mM  $MgCl_2$ , diluted in 10 mM HEPES.HCl pH 8.0 and 100  
608 mM NaCl. Dephosphorylation reactions consisted of 37  $\mu$ M P-ReoM, 3.7  $\mu$ M PrkA-KD, 18.5  
609  $\mu$ M PrkP and 1 mM  $MnCl_2$ , diluted in 10 mM HEPES.HCl pH 8.0 and 100 mM NaCl. In each  
610 case controls were loaded at the same concentrations. The reactions were incubated at 37 °C for  
611 20 minutes prior to electrophoresis at 200 V for 2.5 hours on ice.

612

#### 613 **Isolation of phosphorylated ReoM**

614 Phosphorylation reactions consisted of 37  $\mu$ M ReoM, 3.7  $\mu$ M PrkA-KD, 5 mM ATP and 5 mM  
615  $MgCl_2$ , diluted in 10 mM HEPES.HCl pH 8.0 and 100 mM NaCl, to a total volume of 5 mL. The

616 protein mix was loaded onto a PD 10 desalting column to remove excess ATP and protein  
617 fractions were loaded onto a MonoQ 5/50 GL column. Buffer A consisted of 10 mM HEPES.HCl  
618 pH 8.0 and 100 mM NaCl and buffer B was 10 mM HEPES.HCl pH 8.0 and 1M NaCl. Bound  
619 proteins were eluted over 25 mL with a 15-35% gradient of buffer B.

620

### 621 **Liquid Chromatography-Mass Spectrometry**

622 All liquid chromatography-mass spectrometry (LC-MS) analyses were performed using an  
623 Agilent 6530 Q-TOF instrument with electrospray ionisation (ESI) in positive ion mode, coupled  
624 to an Agilent 1260 Infinity II LC system, utilizing mobile phase of 0.1% (v/v) formic acid in LC-  
625 MS grade water (A) and acetonitrile (B). Prior to peptide mapping, 10  $\mu$ L of purified proteins (~1  
626 mg/ml) were digested using Smart Digest Soluble Trypsin Kit (Thermo Fisher Scientific)  
627 according to the manufacturer's guidelines. Tryptic peptides and intact protein samples were  
628 extracted using HyperSep Spin Tip SPE C18 and C8 tips, respectively (ThermoFisher Scientific)  
629 before analysis. For phosphosite analysis, 10  $\mu$ L of digest was injected onto an Acclaim RSLC  
630 120 C18 column (Thermo Fisher Scientific, 2.1 x 100mm, 2.2  $\mu$ m, 120 Å) for reversed phase  
631 separation at 60°C and 0.4 ml/min, over a linear gradient of 5-40% B over 25 min, 40-90% B  
632 over 8 min followed by equilibration at 5% B for 7 min. ESI source conditions were nebuliser  
633 pressure of 45 psig, drying gas flow of 5 L/min and gas temperature of 325°C. Sheath gas  
634 temperature of 275°C and gas flow of 12 L/min, capillary voltage of 4000V and nozzle voltage of  
635 300V were also applied. Mass spectra were acquired using MassHunter Acquisition software  
636 (version B.08.00) over the 100-3000 m/z range, at a rate of 5 spectra/s and 200 ms/spectrum,  
637 using standard mass range mode (3200 m/z) with extended dynamic range (2 GHz) and collection  
638 of both centroid and profile data. MS/MS fragmentation spectra were acquired over the 100-3000  
639 m/z range, at a rate of 3 spectra/s and 333.3 ms/spectrum. For intact protein analysis, 10  $\mu$ L of

640 desalted protein (~1 mg/ml) was injected onto a Zorbax 300Å Stable Bond C8 column (Agilent  
641 Technologies, 4.6 x 50 mm, 3.5 µM) for reversed phase separation at 60°C and 0.4 mL/min, over  
642 a linear gradient of 15-75% B over 14 min, 75-100% B over 11 min followed by post-run  
643 equilibration at 15% B for 10 min. ESI source conditions were nebuliser pressure of 45 psig,  
644 drying gas flow of 5 L/min and source gas temperature of 325°C were applied. Sheath gas  
645 temperature of 400°C and gas flow of 11 L/min, capillary voltage of 3500V and nozzle voltage of  
646 2000V were also used. Mass spectra were acquired using MassHunter Acquisition software  
647 (version B.08.00) over a mass range of 100-3000 m/z, at a rate of 1 spectra/s and 1000  
648 ms/spectrum in extended mass range (20000 m/z) at 1 GHz. Acquired MS and MS/MS spectra  
649 were analysed using Agilent MassHunter BioConfirm software (version B.10.00) for  
650 identification of phosphorylated residues and subsequent intact mass determination with  
651 processing of raw data using maximum entropy deconvolution.

652

### 653 **Analytical size exclusion chromatography**

654 Purified ReoM and P-ReoM proteins were run individually on a Superdex 200 Increase 10/300  
655 GL column. 100 µl samples at 1.5 mg/mL were injected onto a column equilibrated in 10 mM  
656 HEPES.HCl pH 8.0 and 100 mM NaCl, with a flow of 0.75 mL/min.

657

### 658 **ACKNOWLEDGEMENTS**

659

660 This work was funded by DFG grants HA 6830/1-1 and HA 6830/1-2 and a grant of the Fonds  
661 der Chemischen Industrie to SH. ZR is funded by a UK BBSRC DTP studentship to RJL  
662 (BB/M011186/1). We acknowledge Diamond Light Source for time on beamline I03 under  
663 proposal MX-18598 and Dr. Arnaud Basle for help with X-ray data collection. We thank Ulrich

664 Nübel (Braunschweig) and Janina Döhling for help with some experiments and Petra Kaiser for  
665 technical assistance. We would like to thank the National BioResource Project (NIG, Japan): *B.*  
666 *subtilis* for sharing *B. subtilis* mutant strains. The co-ordinates and structure factors for the crystal  
667 structure of ReoM have been deposited at PDBe with accession code 6TIF.

668

669

#### **AUTHOR CONTRIBUTIONS**

670

671 SW, ZJR, JR, CEJ, LM, RJL and SH designed the experiments. SW, ZJR, JR, CEJ and LM  
672 performed the experimental work. SW, ZJR, JR, CEJ, LM, RJL and SH interpreted the data. RJL  
673 and SH wrote the manuscript.

674

675

#### **COMPETING INTERESTS STATEMENT**

676

677 All authors declare that NO conflicting interests exist.

678

679

680

## REFERENCES

- 681 1. Vollmer W, Blanot D, de Pedro MA. Peptidoglycan structure and architecture. *FEMS Microbiol*  
682 *Rev.* 2008;32(2):149-67.
- 683 2. Typas A, Banzhaf M, Gross CA, Vollmer W. From the regulation of peptidoglycan synthesis to  
684 bacterial growth and morphology. *Nat Rev Microbiol.* 2012;10(2):123-36.
- 685 3. Ruiz N. Bioinformatics identification of MurJ (MviN) as the peptidoglycan lipid II flippase in  
686 *Escherichia coli*. *Proc Natl Acad Sci U S A.* 2008;105(40):15553-7.
- 687 4. Sham LT, Butler EK, Lebar MD, Kahne D, Bernhardt TG, Ruiz N. Bacterial cell wall. MurJ is the  
688 flippase of lipid-linked precursors for peptidoglycan biogenesis. *Science.* 2014;345(6193):220-2.
- 689 5. Meeske AJ, Sham LT, Kimsey H, Koo BM, Gross CA, Bernhardt TG, et al. MurJ and a novel lipid II  
690 flippase are required for cell wall biogenesis in *Bacillus subtilis*. *Proc Natl Acad Sci U S A.*  
691 2015;112(20):6437-42.
- 692 6. Sauvage E, Kerff F, Terrak M, Ayala JA, Charlier P. The penicillin-binding proteins: structure and  
693 role in peptidoglycan biosynthesis. *FEMS Microbiol Rev.* 2008;32(2):234-58.
- 694 7. Meeske AJ, Riley EP, Robins WP, Uehara T, Mekalanos JJ, Kahne D, et al. SEDS proteins are a  
695 widespread family of bacterial cell wall polymerases. *Nature.* 2016;537(7622):634-8.
- 696 8. Emami K, Guyet A, Kawai Y, Devi J, Wu LJ, Allenby N, et al. RodA as the missing  
697 glycosyltransferase in *Bacillus subtilis* and antibiotic discovery for the peptidoglycan polymerase  
698 pathway. *Nat Microbiol.* 2017;2:16253.
- 699 9. Taguchi A, Welsh MA, Marmont LS, Lee W, Sjodt M, Kruse AC, et al. FtsW is a peptidoglycan  
700 polymerase that is functional only in complex with its cognate penicillin-binding protein. *Nat Microbiol.*  
701 2019.
- 702 10. Vollmer W, Joris B, Charlier P, Foster S. Bacterial peptidoglycan (murein) hydrolases. *FEMS*  
703 *Microbiol Rev.* 2008;32(2):259-86.
- 704 11. Uehara T, Bernhardt TG. More than just lysins: peptidoglycan hydrolases tailor the cell wall. *Curr*  
705 *Opin Microbiol.* 2011;14(6):698-703.
- 706 12. Moynihan PJ, Sychantha D, Clarke AJ. Chemical biology of peptidoglycan acetylation and  
707 deacetylation. *Bioorg Chem.* 2014;54:44-50.
- 708 13. Booth S, Lewis RJ. Structural basis for the coordination of cell division with the synthesis of the  
709 bacterial cell envelope. *Protein science : a publication of the Protein Society.* 2019.
- 710 14. Dworkin J. Ser/Thr phosphorylation as a regulatory mechanism in bacteria. *Curr Opin Microbiol.*  
711 2015;24:47-52.
- 712 15. Manuse S, Fleurie A, Zucchini L, Lesterlin C, Grangeasse C. Role of eukaryotic-like  
713 serine/threonine kinases in bacterial cell division and morphogenesis. *FEMS Microbiol Rev.*  
714 2016;40(1):41-56.
- 715 16. Egan AJ, Cleverley RM, Peters K, Lewis RJ, Vollmer W. Regulation of bacterial cell wall growth.  
716 *FEBS J.* 2017;284(6):851-67.
- 717 17. Mir M, Asong J, Li X, Cardot J, Boons GJ, Husson RN. The extracytoplasmic domain of the  
718 *Mycobacterium tuberculosis* Ser/Thr kinase PknB binds specific muropeptides and is required for PknB  
719 localization. *PLoS Pathog.* 2011;7(7):e1002182.
- 720 18. Hardt P, Engels I, Rausch M, Gajdiss M, Ulm H, Sass P, et al. The cell wall precursor lipid II acts as  
721 a molecular signal for the Ser/Thr kinase PknB of *Staphylococcus aureus*. *Int J Med Microbiol.*  
722 2017;307(1):1-10.
- 723 19. Kaur P, Rausch M, Malakar B, Watson U, Damle NP, Chawla Y, et al. LipidII interaction with  
724 specific residues of *Mycobacterium tuberculosis* PknB extracytoplasmic domain governs its optimal  
725 activation. *Nature communications.* 2019;10(1):1231.

- 726 20. Parikh A, Verma SK, Khan S, Prakash B, Nandicoori VK. PknB-mediated phosphorylation of a novel  
727 substrate, N-acetylglucosamine-1-phosphate uridyltransferase, modulates its acetyltransferase activity. J  
728 Mol Biol. 2009;386(2):451-64.
- 729 21. Gee CL, Papavinasundaram KG, Blair SR, Baer CE, Falick AM, King DS, et al. A phosphorylated  
730 pseudokinase complex controls cell wall synthesis in mycobacteria. Sci Signal. 2012;5(208):ra7.
- 731 22. Kieser KJ, Boutte CC, Kester JC, Baer CE, Barczak AK, Meniche X, et al. Phosphorylation of the  
732 Peptidoglycan Synthase PonA1 Governs the Rate of Polar Elongation in Mycobacteria. PLoS Pathog.  
733 2015;11(6):e1005010.
- 734 23. Deng LL, Humphries DE, Arbeit RD, Carlton LE, Smole SC, Carroll JD. Identification of a novel  
735 peptidoglycan hydrolase CwlM in *Mycobacterium tuberculosis*. Biochimica et biophysica acta.  
736 2005;1747(1):57-66.
- 737 24. Boutte CC, Baer CE, Papavinasundaram K, Liu W, Chase MR, Meniche X, et al. A cytoplasmic  
738 peptidoglycan amidase homologue controls mycobacterial cell wall synthesis. eLife. 2016;5.
- 739 25. Turapov O, Forti F, Kadhim B, Ghisotti D, Sassine J, Straatman-Iwanowska A, et al. Two Faces of  
740 CwlM, an Essential PknB Substrate, in *Mycobacterium tuberculosis*. Cell reports. 2018;25(1):57-67 e5.
- 741 26. Brown ED, Vivas EI, Walsh CT, Kolter R. MurA (MurZ), the enzyme that catalyzes the first  
742 committed step in peptidoglycan biosynthesis, is essential in *Escherichia coli*. J Bacteriol.  
743 1995;177(14):4194-7.
- 744 27. Kock H, Gerth U, Hecker M. MurAA, catalysing the first committed step in peptidoglycan  
745 biosynthesis, is a target of Clp-dependent proteolysis in *Bacillus subtilis*. Mol Microbiol. 2004;51(4):1087-  
746 102.
- 747 28. Griffin JE, Gawronski JD, Dejesus MA, Ioerger TR, Akerley BJ, Sasseti CM. High-resolution  
748 phenotypic profiling defines genes essential for mycobacterial growth and cholesterol catabolism. PLoS  
749 Pathog. 2011;7(9):e1002251.
- 750 29. Rismondo J, Bender JK, Halbedel S. Suppressor mutations linking *gpsB* with the first committed  
751 step of peptidoglycan biosynthesis in *Listeria monocytogenes*. J Bacteriol. 2017;199(1).
- 752 30. Pensinger DA, Boldon KM, Chen GY, Vincent WJ, Sherman K, Xiong M, et al. The *Listeria*  
753 *monocytogenes* PASTA Kinase PrkA and its substrate Yvck are required for cell wall homeostasis,  
754 metabolism, and virulence. PLoS Pathog. 2016;12(11):e1006001.
- 755 31. Macek B, Mijakovic I, Olsen JV, Gnad F, Kumar C, Jensen PR, et al. The serine/threonine/tyrosine  
756 phosphoproteome of the model bacterium *Bacillus subtilis*. Molecular & cellular proteomics : MCP.  
757 2007;6(4):697-707.
- 758 32. Pompeo F, Foulquier E, Serrano B, Grangeasse C, Galinier A. Phosphorylation of the cell division  
759 protein GpsB regulates PrkC kinase activity through a negative feedback loop in *Bacillus subtilis*. Mol  
760 Microbiol. 2015;97(1):139-50.
- 761 33. Rismondo J, Cleverley RM, Lane HV, Grosshennig S, Steglich A, Möller L, et al. Structure of the  
762 bacterial cell division determinant GpsB and its interaction with penicillin-binding proteins. Mol  
763 Microbiol. 2016;99(5):978-98.
- 764 34. Cleverley RM, Rismondo J, Lockhart-Cairns MP, Van Bentum PT, Egan AJ, Vollmer W, et al.  
765 Subunit arrangement in GpsB, a regulator of cell wall biosynthesis. Microbial drug resistance.  
766 2016;22(6):446-60.
- 767 35. Cleverley RM, Rutter ZJ, Rismondo J, Corona F, Tsui H-CT, Alatawi FA, et al. The cell cycle  
768 regulator GpsB functions as cytosolic adaptor for multiple cell wall enzymes. Nature communications.  
769 2019;10(1):261.
- 770 36. Halbedel S, Lewis RJ. Structural basis for interaction of DivIVA/GpsB proteins with their ligands.  
771 Mol Microbiol. 2019;111(6):1404-15.
- 772 37. Moliere N, Turgay K. Chaperone-protease systems in regulation and protein quality control in  
773 *Bacillus subtilis*. Res Microbiol. 2009;160(9):637-44.



- 774 38. Hall CL, Tschannen M, Worthey EA, Kristich CJ. IreB, a Ser/Thr kinase substrate, influences  
775 antimicrobial resistance in *Enterococcus faecalis*. *Antimicrob Agents Chemother*. 2013;57(12):6179-86.
- 776 39. Banla IL, Kommineni S, Hayward M, Rodrigues M, Palmer KL, Salzman NH, et al. Modulators of  
777 *Enterococcus faecalis* Cell Envelope Integrity and Antimicrobial Resistance Influence Stable Colonization  
778 of the Mammalian Gastrointestinal Tract. *Infect Immun*. 2018;86(1).
- 779 40. Gerth U, Kock H, Kusters I, Michalik S, Switzer RL, Hecker M. Clp-dependent proteolysis down-  
780 regulates central metabolic pathways in glucose-starved *Bacillus subtilis*. *J Bacteriol*. 2008;190(1):321-31.
- 781 41. Kennelly PJ. Protein phosphatases--a phylogenetic perspective. *Chemical reviews*.  
782 2001;101(8):2291-312.
- 783 42. Madec E, Stensballe A, Kjellstrom S, Cladiere L, Obuchowski M, Jensen ON, et al. Mass  
784 spectrometry and site-directed mutagenesis identify several autophosphorylated residues required for  
785 the activity of PrkC, a Ser/Thr kinase from *Bacillus subtilis*. *J Mol Biol*. 2003;330(3):459-72.
- 786 43. Kristich CJ, Little JL, Hall CL, Hoff JS. Reciprocal regulation of cephalosporin resistance in  
787 *Enterococcus faecalis*. *mBio*. 2011;2(6):e00199-11.
- 788 44. Misra SK, Milohanic E, Ake F, Mijakovic I, Deutscher J, Monnet V, et al. Analysis of the  
789 serine/threonine/tyrosine phosphoproteome of the pathogenic bacterium *Listeria monocytogenes*  
790 reveals phosphorylated proteins related to virulence. *Proteomics*. 2011;11(21):4155-65.
- 791 45. Hall CL, Lytle BL, Jensen D, Hoff JS, Peterson FC, Volkman BF, et al. Structure and Dimerization of  
792 IreB, a Negative Regulator of Cephalosporin Resistance in *Enterococcus faecalis*. *J Mol Biol*.  
793 2017;429(15):2324-36.
- 794 46. Johnson LN, Lewis RJ. Structural basis for control by phosphorylation. *Chemical reviews*.  
795 2001;101(8):2209-42.
- 796 47. Pensinger DA, Aliota MT, Schaezner AJ, Boldon KM, Ansari IU, Vincent WJ, et al. Selective  
797 pharmacologic inhibition of a PASTA kinase increases *Listeria monocytogenes* susceptibility to beta-  
798 lactam antibiotics. *Antimicrob Agents Chemother*. 2014;58(8):4486-94.
- 799 48. Rackette S, Donat S, Ohlsen K, Stehle T. Structural analysis of *Staphylococcus aureus*  
800 serine/threonine kinase PknB. *PLoS One*. 2012;7(6):e39136.
- 801 49. Shah IM, Laaberki MH, Popham DL, Dworkin J. A eukaryotic-like Ser/Thr kinase signals bacteria to  
802 exit dormancy in response to peptidoglycan fragments. *Cell*. 2008;135(3):486-96.
- 803 50. Irazoki O, Hernandez SB, Cava F. Peptidoglycan Muropeptides: Release, Perception, and  
804 Functions as Signaling Molecules. *Frontiers in microbiology*. 2019;10:500.
- 805 51. Kohlrausch U, Höltje JV. Analysis of murein and murein precursors during antibiotic-induced lysis  
806 of *Escherichia coli*. *J Bacteriol*. 1991;173(11):3425-31.
- 807 52. Kirstein J, Molière N, Dougan DA, Turgay K. Adapting the machine: adaptor proteins for  
808 Hsp100/Clp and AAA+ proteases. *Nature Reviews Microbiology*. 2009;7:589.
- 809 53. Mulvenna N, Hantke I, Burchell L, Nicod S, Bell D, Turgay K, et al. Xenogeneic modulation of the  
810 ClpCP protease of *Bacillus subtilis* by a phage-encoded adaptor-like protein. *Journal of Biological*  
811 *Chemistry*. 2019.
- 812 54. Kirstein J, Dougan DA, Gerth U, Hecker M, Turgay K. The tyrosine kinase McsB is a regulated  
813 adaptor protein for ClpCP. *The EMBO Journal*. 2007;26(8):2061-70.
- 814 55. Trentini DB, Suskiewicz MJ, Heuck A, Kurzbauer R, Deszcz L, Mechtler K, et al. Arginine  
815 phosphorylation marks proteins for degradation by a Clp protease. *Nature*. 2016;539(7627):48-53.
- 816 56. Elsholz AK, Turgay K, Michalik S, Hessling B, Gronau K, Oertel D, et al. Global impact of protein  
817 arginine phosphorylation on the physiology of *Bacillus subtilis*. *Proc Natl Acad Sci U S A*.  
818 2012;109(19):7451-6.
- 819 57. Rued BE, Zheng JJ, Mura A, Tsui HT, Boersma MJ, Mazny JL, et al. Suppression and synthetic-  
820 lethal genetic relationships of DeltagsB mutations indicate that GpsB mediates protein phosphorylation  
821 and penicillin-binding protein interactions in *Streptococcus pneumoniae* D39. *Mol Microbiol*.  
822 2017;103(6):931-57.

- 823 58. Lewis RJ. The GpsB files: the truth is out there. *Mol Microbiol.* 2017;103(6):913-8.
- 824 59. Ulrych A, Holečková N, Goldová J, Doubravová L, Benada O, Kofroňová O, et al. Characterization  
825 of pneumococcal Ser/Thr protein phosphatase *phpP* mutant and identification of a novel PhpP substrate,  
826 putative RNA binding protein Jag. *BMC Microbiology.* 2016;16(1):247.
- 827 60. Madec E, Laszkiewicz A, Iwanicki A, Obuchowski M, Seror S. Characterization of a membrane-  
828 linked Ser/Thr protein kinase in *Bacillus subtilis*, implicated in developmental processes. *Mol Microbiol.*  
829 2002;46(2):571-86.
- 830 61. Ravikumar V, Shi L, Krug K, Derouiche A, Jers C, Cousin C, et al. Quantitative phosphoproteome  
831 analysis of *Bacillus subtilis* reveals novel substrates of the kinase PrkC and phosphatase PrpC. *Molecular*  
832 *& cellular proteomics : MCP.* 2014;13(8):1965-78.
- 833 62. Vesic D, Kristich CJ. MurAA is required for intrinsic cephalosporin resistance of *Enterococcus*  
834 *faecalis*. *Antimicrob Agents Chemother.* 2012;56(5):2443-51.
- 835 63. Sambrook J, Fritsch EF, Maniatis T. *Molecular cloning : a laboratory manual.* 2nd ed. Cold Spring  
836 Harbor, N.Y.: Cold Spring Harbor Laboratory Press; 1989. 3 v. p.
- 837 64. Rismondo J, Möller L, Aldridge C, Gray J, Vollmer W, Halbedel S. Discrete and overlapping  
838 functions of peptidoglycan synthases in growth, cell division and virulence of *Listeria monocytogenes*.  
839 *Mol Microbiol.* 2015;95(2):332-51.
- 840 65. Monk IR, Gahan CG, Hill C. Tools for functional postgenomic analysis of *Listeria monocytogenes*.  
841 *Appl Environ Microbiol.* 2008;74(13):3921-34.
- 842 66. Peränen J, Rikkinen M, Hyvonen M, Kaariainen L. T7 vectors with modified T7lac promoter for  
843 expression of proteins in *Escherichia coli*. *Anal Biochem.* 1996;236(2):371-3.
- 844 67. van den Ent F, Löwe J. RF cloning: a restriction-free method for inserting target genes into  
845 plasmids. *J Biochem Biophys Methods.* 2006;67(1):67-74.
- 846 68. Arnaud M, Chastanet A, Debarbouille M. New vector for efficient allelic replacement in naturally  
847 nontransformable, low-GC-content, gram-positive bacteria. *Appl Environ Microbiol.* 2004;70(11):6887-  
848 91.
- 849 69. Karimova G, Pidoux J, Ullmann A, Ladant D. A bacterial two-hybrid system based on a  
850 reconstituted signal transduction pathway. *Proc Natl Acad Sci U S A.* 1998;95(10):5752-6.
- 851 70. Glaser P, Frangeul L, Buchrieser C, Rusniok C, Amend A, Baquero F, et al. Comparative genomics  
852 of *Listeria* species. *Science.* 2001;294(5543):849-52.
- 853 71. Marston AL, Thomaidis HB, Edwards DH, Sharpe ME, Errington J. Polar localization of the MinD  
854 protein of *Bacillus subtilis* and its role in selection of the mid-cell division site. *Genes Dev.*  
855 1998;12(21):3419-30.
- 856 72. Battye TG, Kontogiannis L, Johnson O, Powell HR, Leslie AG. iMOSFLM: a new graphical interface  
857 for diffraction-image processing with MOSFLM. *Acta crystallographica Section D, Biological*  
858 *crystallography.* 2011;67(Pt 4):271-81.
- 859 73. Evans PR, Murshudov GN. How good are my data and what is the resolution? *Acta*  
860 *crystallographica Section D, Biological crystallography.* 2013;69(Pt 7):1204-14.
- 861 74. McCoy AJ, Grosse-Kunstleve RW, Adams PD, Winn MD, Storoni LC, Read RJ. Phaser  
862 crystallographic software. *Journal of applied crystallography.* 2007;40(Pt 4):658-74.
- 863 75. Emsley P, Lohkamp B, Scott WG, Cowtan K. Features and development of Coot. *Acta*  
864 *crystallographica Section D, Biological crystallography.* 2010;66(Pt 4):486-501.
- 865 76. Murshudov GN, Vagin AA, Dodson EJ. Refinement of macromolecular structures by the  
866 maximum-likelihood method. *Acta crystallographica Section D, Biological crystallography.* 1997;53(Pt  
867 3):240-55.
- 868 77. Claessen D, Emmins R, Hamoen LW, Daniel RA, Errington J, Edwards DH. Control of the cell  
869 elongation-division cycle by shuttling of PBP1 protein in *Bacillus subtilis*. *Mol Microbiol.* 2008;68(4):1029-  
870 46.

871 78. Koo BM, Kritikos G, Farelli JD, Todor H, Tong K, Kimsey H, et al. Construction and analysis of two  
872 genome-scale deletion libraries for *Bacillus subtilis*. Cell Syst. 2017;4(3):291-305 e7.

873

874

875

## FIGURE LEGENDS

876

877 **Figure 1:** Suppression of the growth defects of a *L. monocytogenes*  $\Delta gpsB$  mutant by *reoM* and  
878 *reoY* mutations.

879 (A-B) Effect of suppressor mutations on growth of the  $\Delta gpsB$  mutant. Growth of *L.*  
880 *monocytogenes* strains EGD-e (wt), LMJR19 ( $\Delta gpsB$ ), *shg8* ( $\Delta gpsB$  *reoY* H87Y), *shg10* ( $\Delta gpsB$   
881 *reoY* TAA74) and *shg12* ( $\Delta gpsB$  *reoM* RBS mutation) in BHI broth at 37°C (A) and 42°C (B).

882 (C-D) Effect of  $\Delta reoM$  and  $\Delta reoY$  deletions on growth of *L. monocytogenes*. Growth of *L.*  
883 *monocytogenes* strains EGD-e (wt), LMJR19 ( $\Delta gpsB$ ), LMSW30 ( $\Delta reoM$ ), LMSW32 ( $\Delta reoY$ ),  
884 LMJR137 ( $\Delta gpsB$   $\Delta reoM$ ) and LMJR120 ( $\Delta gpsB$   $\Delta reoY$ ) in BHI broth was recorded at 37°C (C)  
885 and 42°C (D). All growth experiments were performed three times and average values and  
886 standard deviations are shown.

887

888 **Figure 2:** Effect of the *reoM*, *reoY* and *clpC* genes on levels of MurA in *L. monocytogenes* and  
889 MurAA in *B. subtilis*.

890 (A) Effect of *reoM* and *reoY* deletions (single or when combined with *gpsB* deletion) on MurA  
891 (above) and DivIVA levels (middle) in *L. monocytogenes* strains EGD-e (wt), LMJR19 ( $\Delta gpsB$ ),  
892 LMSW30 ( $\Delta reoM$ ), LMSW32 ( $\Delta reoY$ ), LMJR137 ( $\Delta gpsB$   $\Delta reoM$ ) and LMJR120 ( $\Delta gpsB$   $\Delta reoY$ )  
893 and quantification of MurA levels (below). Strain LMJR138 ( $\Delta clpC$ ) was included for  
894 comparison. Non-relevant lanes were excised from the blots (dotted lines). Average values  $\pm$   
895 standard deviations were shown (n=3). Statistically significant differences compared to wild type  
896 are marked by asterisks ( $P < 0.05$ , *t*-test).

897 (B) Effect of *reoM*, *reoY* and *murZ* deletions when combined with *clpC* deletion on MurA  
898 (above) and DivIVA levels (middle) in *L. monocytogenes* strains EGD-e (wt), LMJR138 ( $\Delta clpC$ ),

899 LMJR104 ( $\Delta murZ$ ), LMJR171 ( $\Delta clpC \Delta murZ$ ), LMSW30 ( $\Delta reoM$ ), LMSW50 ( $\Delta clpC \Delta reoM$ ),  
900 LMSW32 ( $\Delta reoY$ ) and LMSW51 ( $\Delta clpC \Delta reoY$ ) and quantification of MurA levels (below).  
901 Strain LMJR123 (*ImurA*) grown in the presence or absence of IPTG was included for  
902 comparison. Average values and standard deviations were shown (n=3) and n. s. means not  
903 significant ( $P < 0.05$ , *t*-test).

904 (C) Western blots following MurA degradation *in vivo*. *L. monocytogenes* strains EGD-e (wt),  
905 LMJR138 ( $\Delta clpC$ ), LMSW30 ( $\Delta reoM$ ) and LMSW32 ( $\Delta reoY$ ) were grown to an OD<sub>600</sub> of 1.0  
906 and 100  $\mu\text{g/ml}$  chloramphenicol was added. Samples were taken before chloramphenicol addition  
907 and after several time intervals to analyze MurA levels. MurA signals were quantified by  
908 densitometry and average values and standard deviations are shown (n=3). Statistically  
909 significant differences are marked with asterisks ( $P < 0.05$ , *t*-test).

910 (D) Effect of the *reoM* and *reoY* homologs *yrzL* and *yplB*, respectively, on MurAA (above) and  
911 DivIVA levels (middle) of *B. subtilis* and quantification of MurAA levels (below). Strains  
912 BKE00860 ( $\Delta clpC$ ), BKE22180 ( $\Delta gpsB$ ), BKE22580 ( $\Delta yplB/reoY$ ) and BKE27400  
913 ( $\Delta yrzL/reoM$ ) were grown to mid-logarithmic growth phase before total cellular proteins were  
914 isolated. *B. subtilis* 168 (wt) was included as control. That MurAA is detected in two isoforms  
915 had been observed earlier but the reasons for this are not known (27). Average values and  
916 standard deviations were shown (n=3). Asterisks indicate statistically significant differences  
917 compared to wild type ( $P < 0.05$ , *t*-test).

918  
919 **Figure 3:** The PrkA/PrkP pair controls the phosphorylation status of ReoM.  
920 Non-denaturing, native PAGE analysis of the phosphorylation (A) and dephosphorylation (B) of  
921 ReoM *in vitro*. The components of each lane in the Coomassie-stained gel are annotated above  
922 the image and the position and identity of relevant bands is marked to the side.

923 (C) LC-MS analysis of intact ReoM. The deconvoluted mass spectrum for non-phosphorylated  
924 ReoM (black) is overlaid over the equivalent spectrum for mono-phosphorylated ReoM, P-ReoM  
925 (red).

926 (D) LC-MS/MS was used to perform peptide mapping analysis that revealed that Thr7 is the sole  
927 phosphosite of ReoM. The MS/MS fragmentation spectra of the phosphorylated peptide  
928 encompassing Asp5-Lys22 is presented with *b*-ion fragmentation in blue and *y*-ion fragmentation  
929 shown in red, whilst the precursor ion ( $m/z$  1116.86,  $z=2+$ ) is represented by a blue diamond.

930

931 **Figure 4:** A ReoM T7A exchange affects growth and MurA levels in a ClpC-dependent manner.

932 (A) Lethality of the *reoM T7A* mutation in *L. monocytogenes*. *L. monocytogenes* strains EGD-e  
933 (wt), LMSW30 ( $\Delta reoM$ ), LMSW57 (*ireoM*) and LMSW52 (*ireoM T7A*) were grown in BHI  
934 broth  $\pm$  1 mM IPTG at 37°C. The experiment was repeated three times and average values and  
935 standard deviations are shown. (B) Suppression of *reoM T7A* lethality by deletion of *clpC*. *L.*  
936 *monocytogenes* strains EGD-e (wt), LMJR138 ( $\Delta clpC$ ), LMSW52 (*ireoM T7A*) and LMSW72  
937 (*ireoM T7A*  $\Delta clpC$ ) were grown in BHI broth  $\pm$  1 mM IPTG at 37°C. The experiment was  
938 repeated three times and average values and standard deviations are shown. (C) Western blot  
939 showing cellular levels of MurA (top) and ClpC (middle) in the strains included in panels A and  
940 B. For this experiment, strains were grown in BHI broth not containing IPTG at 37°C. IPTG (1  
941 mM) was added to the cultures at an OD<sub>600</sub> of 0.2 and the cells were collected 2 hours later.  
942 Irrelevant lanes were removed from both blots (dotted lines). Quantification of MurA signals by  
943 densitometry is shown below the Western blots. Average values and standard deviations  
944 calculated from three independent experiments are shown. Asterisks indicate statistically  
945 significant differences ( $P < 0.05$ , *t*-test). (D) ReoMT7A expression sensitizes *L. monocytogenes*  
946 against ceftriaxone. Synergism between ceftriaxone and IPTG in the *ireoMT7A* strain LMSW52

947 in a disc diffusion assay with filter discs containing 50 mg/ml ceftriaxone (CRO, left) and 1 mM  
948 IPTG (right). For comparison, wild type levels of growth inhibition by ceftriaxone are marked  
949 with black circles. Zone of growth inhibition by IPTG in the *ireoM T7A* mutant is marked with a  
950 white circle. Please note that strain LMSW52 shows hetero-resistance against IPTG (two zones  
951 of growth inhibition with different resistance levels). Arrows mark the zones of synergism  
952 between ceftriaxone and IPTG. (E) Contribution of ReoY and MurZ to the lethal *reoM T7A*  
953 phenotype. *L. monocytogenes* strains EGD-e (wt), LMSW52 (*ireoM T7A*), LMSW72 (*ireoM T7A*  
954  $\Delta clpC$ ), LMSW123 (*ireoM T7A \Delta reoY*) and LMSW124 (*ireoM T7A \Delta murZ*) were grown in BHI  
955 broth containing 1 mM IPTG and growth at 37°C was recorded in a microplate reader. Average  
956 values and standard deviations were calculated from an experiment performed in triplicate.

957

958 **Figure 5:** Crystal structure of ReoM.

959 (A) The structure of ReoM depicted as a cartoon with each protomer in the dimer coloured  
960 separately (cyan and orange). The secondary structure elements are numbered according to their  
961 position in the amino acid sequence. Thr7 and some of the key amino acids in the dimer interface  
962 and the hydrophobic core are drawn as stick figures. (B) Sequence alignment of ReoM (*Lmo*) and  
963 its homologues from *Bacillus subtilis* (*Bsu*), *Streptococcus pneumoniae* (*Spn*), *Clostridium*  
964 *difficile* (*Cdi*) and *Staphylococcus aureus* (*Sau*) with the sequence of IreB from *Enterococcus*  
965 *faecalis* (*Efa*) underneath. Amino acid sequence numbers pertain to ReoM and the site of  
966 phosphorylation in ReoM (Thr7) and the twin phosphorylations in IreB (minor site: Thr4; major  
967 site: Thr7) are highlighted. Invariant amino acids are shaded black, residues in the ReoM dimer  
968 interface have an asterisk above, and the secondary structure elements are defined by cylinders  
969 above the alignment. Arginine residues mutated in this study are indicated by a hashtag above the  
970 alignment. (C) The final  $2F_{\text{obs}}-F_{\text{calc}}$  electron density map, contoured at a level of  $0.42 \text{ e}^{-}/\text{\AA}^3$ , of the

971 N-terminal region in the immediate vicinity of Thr7 in chain A of the ReoM dimer indicates that  
972 the protein model could be built with confidence even though this region contains no secondary  
973 structure elements.

974

975 **Figure 6:** Effect of *prkA* and *prkP* mutations on growth and MurA levels of *L. monocytogenes*.

976 (A) Contribution of PrkA and PrkP to *L. monocytogenes* growth. *L. monocytogenes* strains EGD-  
977 e (wt), LMSW76 ( $\Delta prkP prkA^*$ ), LMSW83 (*iprkP*) and LMSW84 (*iprkA*) were grown in BHI  
978 broth containing or not containing 1 mM IPTG at 37°C in a microtiter plate reader. The  
979 experiment was repeated three times and average values and standard deviations are shown. (B)  
980 Contribution of PrkA and PrkP to MurA stability. Western blots showing cellular levels of MurA  
981 (top) and DivIVA (middle) in the same set of strains as in panel A and quantification of MurA  
982 signals by densitometry (below). Average values and standard deviations calculated from three  
983 independent experiments are shown. Asterisks indicate statistically significant differences  
984 ( $P < 0.05$ , *t*-test).

985

986 **Fig. 7:** PrkA essentiality depends on *reoM*, *reoY* and *clpC*.

987 (A) Effect of *reoM*, *reoY* and *clpC* deletions on *prkA* essentiality. *L. monocytogenes* strains EGD-  
988 e (wt), LMSW84 (*iprkA*), LMSW89 (*iprkA*  $\Delta reoM$ ), LMSW90 (*iprkA*  $\Delta reoY$ ) and LMSW91  
989 (*iprkA*  $\Delta clpC$ ) were grown in BHI broth  $\pm$  1 mM IPTG at 37°C in a microtiter plate reader. The  
990 experiment was repeated three times and average values and standard deviations are shown. (B)  
991 *clpC*, *reoM* and *reoY* deletions overcome MurA degradation in PrkA-depleted cells. Western blot  
992 showing MurA levels in *L. monocytogenes* strains EGD-e (wt), LMJR138 ( $\Delta clpC$ ), LMSW30  
993 ( $\Delta reoM$ ), LMSW32 ( $\Delta reoY$ ), LMSW84 (*iprkA*), LMSW89 (*iprkA*  $\Delta reoM$ ), LMSW90 (*iprkA*  
994  $\Delta reoY$ ) and LMSW91 (*iprkA*  $\Delta clpC$ , top). PrkA wild type strains were grown in BHI broth at



995 37°C to mid-exponential growth phase before protein isolation. A parallel DivIVA Western blot  
996 was used as loading control (middle). Quantification of MurA signals by densitometry (below).  
997 Average values and standard deviations calculated from three independent experiments are  
998 shown. Asterisks indicate statistically significant differences ( $P < 0.05$ , *t*-test). (C) Illustrations  
999 summarizing the genetic interactions detected in this work between PrkA, ReoM, ReoY, MurZ,  
1000 ClpC and MurA (above) and the physical interactions between them as detected by bacterial two  
1001 hybrid analysis (bottom, raw data are shown in Fig. S13).

1002

1003 **Fig. 8:** ReoM links PrkA-dependent muropeptide sensing with peptidoglycan biosynthesis.

1004 Model illustrating the role of ReoM as substrate of PrkA and as regulator of ClpCP. Cell wall  
1005 damage is sensed by PrkA through recognition of free muropeptides upon which PrkA  
1006 phosphorylates ReoM. In its unphosphorylated form, ReoM is an activator of ClpCP-dependent  
1007 degradation of MurA, the first enzyme of peptidoglycan biosynthesis, and ReoY and MurZ  
1008 contribute to this process. By phosphorylating ReoM, PrkA prevents ClpCP-dependent MurA  
1009 degradation so that MurA accumulates and peptidoglycan biosynthesis can occur. Please note that  
1010 there is a lesser degree of conservation in the fourth PASTA domain of PrkA.

1011

1012 **Table 1:** Minimal inhibitory concentrations (MIC) of ceftriaxone

1013 Average values and standard deviations are calculated from three independent experiments.

| strain              | genotype                    | IPTG | MIC ceftriaxone [ $\mu\text{g/ml}$ ] |
|---------------------|-----------------------------|------|--------------------------------------|
| EGD-e               | wt                          | -    | 8 $\pm$ 0                            |
| LMJR116             | wt+ <i>murA</i>             | -    | 16 $\pm$ 0                           |
|                     |                             | +    | 96 $\pm$ 0                           |
| LMJR123             | <i>imurA</i>                | -    | 2 $\pm$ 1                            |
|                     |                             | +    | 14 $\pm$ 2                           |
| LMJR138             | $\Delta$ <i>clpC</i>        | -    | 96 $\pm$ 0                           |
| LMSW30              | $\Delta$ <i>reoM</i>        | -    | 19 $\pm$ 5                           |
| LMSW32              | $\Delta$ <i>reoY</i>        | -    | 21 $\pm$ 5                           |
| LMJR104             | $\Delta$ <i>murZ</i>        | -    | 24 $\pm$ 0                           |
| LMSW76              | $\Delta$ <i>prkP prkA</i> * | -    | 21 $\pm$ 5                           |
| LMSW84 <sup>a</sup> | <i>iprka</i>                | -    | 0.05 $\pm$ 0                         |
|                     |                             | +    | 1.5 $\pm$ 0                          |

1014 <sup>a</sup> The *iprka* strain showed residual growth on BHI agar plates not containing IPTG, even though

1015 it required IPTG for growth in BHI broth.

1016 **Table 2:** Summary of the data collection and refinement statistics for ReoM.

| <b>Data collection</b>                          |                                                |
|-------------------------------------------------|------------------------------------------------|
| Beamline                                        | Diamond I03                                    |
| Wavelength (Å)                                  | 0.976                                          |
| Resolution (Å)                                  | 74.45-1.60 (1.63-1.60)*                        |
| Space group                                     | P 2 <sub>1</sub> 2 <sub>1</sub> 2 <sub>1</sub> |
| <i>a</i> , <i>b</i> , <i>c</i> (Å)              | 38.79, 58.62, 74.45                            |
| $\alpha$ , $\beta$ , $\gamma$ (°)               | 90, 90, 90                                     |
| R <sub>pim</sub>                                | 0.064 (0.533)                                  |
| CC (1/2) (%)                                    | 98.6 (62.0)                                    |
| $\langle I \rangle / \langle \sigma(I) \rangle$ | 8.2 (2.2)                                      |
| Completeness (%)                                | 99.8 (99.8)                                    |
| Redundancy                                      | 4.8 (4.9)                                      |
| Total observations                              | 111229 (5581)                                  |
| Unique reflections                              | 23059 (1129)                                   |
| <b>Refinement</b>                               |                                                |
| R <sub>work</sub> (%)                           | 15.3                                           |
| R <sub>free</sub> (%)                           | 21.4                                           |
| Solvent content (%)                             | 38.0                                           |
| # atoms                                         |                                                |
| Protein                                         | 1399                                           |
| Ligand/ion                                      | 20                                             |
| Water                                           | 94                                             |
| <b>B-factors (Å<sup>2</sup>)</b>                |                                                |
| Protein                                         | 26.4                                           |
| Ligand/ion                                      | 50.5                                           |
| Water                                           | 37.7                                           |
| R.m.s deviations                                |                                                |
| Bonds (Å)                                       | 0.015                                          |
| Angles (°)                                      | 1.79                                           |

1017 \*Where values in parentheses refer to the highest resolution shell.

1018

1019 **Table 3:** Plasmids and strains used in this study

| name                            | relevant characteristics                    | source*/ reference |
|---------------------------------|---------------------------------------------|--------------------|
| <b>Plasmids</b>                 |                                             |                    |
| pIMK3                           | $P_{help}$ - <i>lacO lacI neo</i>           | (65)               |
| pMAD                            | <i>bla erm bgaB</i>                         | (68)               |
| pUT18                           | <i>bla P<sub>lac</sub>-cya(T18)</i>         | (69)               |
| pUT18C                          | <i>bla P<sub>lac</sub>-cya(T18)</i>         | (69)               |
| pKT25                           | <i>kan P<sub>lac</sub>-cya(T25)</i>         | (69)               |
| p25-N                           | <i>kan P<sub>lac</sub>-cya(T25)</i>         | (77)               |
| pJR127                          | <i>bla erm bgaB ΔclpC (lmo0232)</i>         | (29)               |
| pSH246                          | <i>bla erm bgaB ΔgpsB (lmo1888)</i>         | (33)               |
| pJR68                           | <i>bla erm bgaB ΔmurZ (lmo2552)</i>         | (29)               |
| pJR65                           | $P_{help}$ - <i>lacO-reoM lacI neo</i>      | this work          |
| pJR70                           | $P_{help}$ - <i>lacO-reoY lacI neo</i>      | this work          |
| pJR83                           | <i>bla erm bgaB ΔreoY (lmo1921)</i>         | this work          |
| pJR101                          | <i>kan P<sub>lac</sub>-cya(T25)-reoM</i>    | this work          |
| pJR102                          | <i>kan P<sub>lac</sub>-reoM-cya(T25)</i>    | this work          |
| pJR103                          | <i>bla P<sub>lac</sub>-reoM-cya(T18)</i>    | this work          |
| pJR104                          | <i>bla P<sub>lac</sub>-cya(T18)-reoM</i>    | this work          |
| pJR109                          | <i>kan P<sub>lac</sub>-cya(T25)-reoY</i>    | this work          |
| pJR111                          | <i>bla P<sub>lac</sub>-cya(T18)-reoY</i>    | this work          |
| pJR116                          | <i>kan P<sub>lac</sub>-cya(T25)-murA</i>    | this work          |
| pJR117                          | <i>kan P<sub>lac</sub>-murA-cya(T25)</i>    | this work          |
| pJR118                          | <i>bla P<sub>lac</sub>-murA-cya(T18)</i>    | this work          |
| pJR119                          | <i>bla P<sub>lac</sub>-cya(T18)-murA</i>    | this work          |
| pJR121                          | <i>bla P<sub>lac</sub>-reoY-cya(T18)</i>    | this work          |
| pJR126                          | <i>bla erm bgaB ΔreoM (lmo1503)</i>         | this work          |
| pSW29                           | $P_{help}$ - <i>lacO-reoM T7A lacI neo</i>  | this work          |
| pSW36                           | <i>bla erm bgaB ΔprkA (lmo1820)</i>         | this work          |
| pSW37                           | <i>bla erm bgaB ΔprkP (lmo1821)</i>         | this work          |
| pSW38                           | $P_{help}$ - <i>lacO-prkA lacI neo</i>      | this work          |
| pSW39                           | $P_{help}$ - <i>lacO-prkP lacI neo</i>      | this work          |
| pSW43                           | <i>kan P<sub>lac</sub>-cya(T25)-clpC</i>    | this work          |
| pSW44                           | <i>kan P<sub>lac</sub>-cya(T25)-clpP</i>    | this work          |
| pSW45                           | <i>kan P<sub>lac</sub>-clpC-cya(T25)</i>    | this work          |
| pSW46                           | <i>kan P<sub>lac</sub>-clpP-cya(T25)</i>    | this work          |
| pSW47                           | <i>bla P<sub>lac</sub>-clpC-cya(T18)</i>    | this work          |
| pSW48                           | <i>bla P<sub>lac</sub>-clpP-cya(T18)</i>    | this work          |
| pSW49                           | <i>bla P<sub>lac</sub>-cya(T18)-clpC</i>    | this work          |
| pSW50                           | <i>bla P<sub>lac</sub>-cya(T18)-clpP</i>    | this work          |
| pSW55                           | $P_{help}$ - <i>lacO-reoM R66A lacI neo</i> | this work          |
| pSW56                           | $P_{help}$ - <i>lacO-reoM R70A lacI neo</i> | this work          |
| pSW58                           | $P_{help}$ - <i>lacO-reoM R57A lacI neo</i> | this work          |
| pSW59                           | $P_{help}$ - <i>lacO-reoM R62A lacI neo</i> | this work          |
| <b>B. subtilis strains</b>      |                                             |                    |
| 168                             | wild type, lab collection                   |                    |
| BKE00860                        | $ΔclpC$                                     | (78)               |
| BKE22180                        | $ΔgpsB$                                     | (78)               |
| BKE22580                        | $ΔypiB (reoY)$                              | (78)               |
| BKE27400                        | $ΔyrzL (reoM)$                              | (78)               |
| <b>L. monocytogenes strains</b> |                                             |                    |
| EGD-e                           | wild-type, serovar 1/2a strain              | (70)               |
| LMJR19                          | $ΔgpsB (lmo1888)$                           | (33)               |
| LMJR104                         | $ΔmurZ (lmo2552)$                           | (29)               |

| <b>name</b>  | <b>relevant characteristics</b>                                                            | <b>source*/ reference</b> |
|--------------|--------------------------------------------------------------------------------------------|---------------------------|
| LMJR116      | <i>attB::P<sub>help</sub>-lacO-murA lacI neo</i>                                           | (29)                      |
| LMJR123      | $\Delta$ <i>murA (lmo2526) attB::P<sub>help</sub>-lacO-murA lacI neo</i>                   | (29)                      |
| LMJR138      | $\Delta$ <i>clpC (lmo0232)</i>                                                             | (29)                      |
| <i>shg8</i>  | $\Delta$ <i>gpsB reoY H87Y</i>                                                             | this work                 |
| <i>shg10</i> | $\Delta$ <i>gpsB reoY TAA74</i>                                                            | this work                 |
| <i>shg12</i> | $\Delta$ <i>gpsB reoM</i> RBS mutation                                                     | this work                 |
| LMJR96       | $\Delta$ <i>gpsB attB::P<sub>help</sub>-lacO-reoM lacI neo</i>                             | pJR65 → LMJR19            |
| LMJR102      | $\Delta$ <i>attB::P<sub>help</sub>-lacO-reoM lacI neo</i>                                  | pJR65 → EGD-e             |
| LMJR106      | $\Delta$ <i>gpsB attB::P<sub>help</sub>-lacO-reoY lacI neo</i>                             | pJR70 → LMJR19            |
| LMJR120      | $\Delta$ <i>gpsB <math>\Delta</math>reoY</i>                                               | pJR83 ↔ LMJR19            |
| LMJR137      | $\Delta$ <i>gpsB <math>\Delta</math>reoM</i>                                               | pJR126 ↔ LMJR19           |
| LMJR171      | $\Delta$ <i>clpC <math>\Delta</math>murZ</i>                                               | pJR127 ↔ LMJR104          |
| LMSW30       | $\Delta$ <i>reoM (lmo1503)</i>                                                             | pJR126 ↔ EGD-e            |
| LMSW32       | $\Delta$ <i>reoY (lmo1921)</i>                                                             | pJR83 ↔ EGD-e             |
| LMSW50       | $\Delta$ <i>clpC <math>\Delta</math>reoM</i>                                               | pJR127 ↔ LMSW30           |
| LMSW51       | $\Delta$ <i>clpC <math>\Delta</math>reoY</i>                                               | pJR127 ↔ LMSW32           |
| LMSW52       | $\Delta$ <i>reoM attB::P<sub>help</sub>-lacO-reoM T7A lacI neo</i>                         | pSW29 → LMSW30            |
| LMSW57       | $\Delta$ <i>reoM attB::P<sub>help</sub>-lacO-reoM lacI neo</i>                             | pJR65 → LMSW30            |
| LMSW72       | $\Delta$ <i>reoM attB::P<sub>help</sub>-lacO-reoM T7A lacI neo <math>\Delta</math>clpC</i> | pJR127 ↔ LMSW52           |
| LMSW76       | $\Delta$ <i>prkP prkA*</i>                                                                 | pSW37 ↔ EGD-e             |
| LMSW80       | $\Delta$ <i>attB::P<sub>help</sub>-lacO-prkA lacI neo</i>                                  | pSW38 → EGD-e             |
| LMSW81       | $\Delta$ <i>attB::P<sub>help</sub>-lacO-prkP lacI neo</i>                                  | pSW39 → EGD-e             |
| LMSW83       | $\Delta$ <i>prkP attB::P<sub>help</sub>-lacO-prkP lacI neo</i>                             | pSW37 ↔ LMSW81            |
| LMSW84       | $\Delta$ <i>prkA attB::P<sub>help</sub>-lacO-prkA lacI neo</i>                             | pSW36 ↔ LMSW80            |
| LMSW89       | $\Delta$ <i>prkA attB::P<sub>help</sub>-lacO-prkA lacI neo <math>\Delta</math>reoM</i>     | pJR126 ↔ LMSW84           |
| LMSW90       | $\Delta$ <i>prkA attB::P<sub>help</sub>-lacO-prkA lacI neo <math>\Delta</math>reoY</i>     | pJR83 ↔ LMSW84            |
| LMSW91       | $\Delta$ <i>prkA attB::P<sub>help</sub>-lacO-prkA lacI neo <math>\Delta</math>clpC</i>     | pJR127 ↔ LMSW84           |
| LMSW117      | $\Delta$ <i>reoM <math>\Delta</math>reoY</i>                                               | pJR126 ↔ LMSW32           |
| LMSW118      | $\Delta$ <i>reoY <math>\Delta</math>murZ</i>                                               | pJR68 ↔ LMSW32            |
| LMSW119      | $\Delta$ <i>reoM <math>\Delta</math>murZ</i>                                               | pJR68 ↔ LMSW30            |
| LMSW120      | $\Delta$ <i>reoM attB::P<sub>help</sub>-lacO-reoM R66A lacI neo</i>                        | pSW55 → LMSW30            |
| LMSW121      | $\Delta$ <i>reoM attB::P<sub>help</sub>-lacO-reoM R70A lacI neo</i>                        | pSW56 → LMSW30            |
| LMSW123      | $\Delta$ <i>reoM attB::P<sub>help</sub>-lacO-reoM T7A lacI neo <math>\Delta</math>reoY</i> | pSW29 → LMSW117           |
| LMSW124      | $\Delta$ <i>reoM attB::P<sub>help</sub>-lacO-reoM T7A lacI neo <math>\Delta</math>murZ</i> | pSW29 → LMSW119           |
| LMSW125      | $\Delta$ <i>reoM attB::P<sub>help</sub>-lacO-reoM R57A lacI neo</i>                        | pSW58 → LMSW30            |
| LMSW126      | $\Delta$ <i>reoM attB::P<sub>help</sub>-lacO-reoM R62A lacI neo</i>                        | pSW59 → LMSW30            |

1020 \* The arrow (→) stands for a transformation event and the double arrow (↔) indicates gene  
1021 deletions obtained by chromosomal insertion and subsequent excision of pMAD plasmid  
1022 derivatives (see experimental procedures for details).

1023

1024

1025

1026 **Table 4: Oligonucleotides used in this study.**

| name     | sequence (5'→3')                                 |
|----------|--------------------------------------------------|
| JR163    | GCGCCCATGGCTAAGGCATCCATTTCAATAGACGAGAAG          |
| JR164    | GCGCGTCGACTTATTCTTTTTCCGTATCCATTTGCTGTA          |
| JR169    | GCGCCCATGGATTCAAAAGATCAAACAATGTTTTACAACCTTC      |
| JR170    | GCGCGTCGACTCATTCTCACCAATTTTCGTTATTTTTTCAG        |
| JR197    | GCGCGGATCCCAATTATTTTCGAATGGTGC GG TGTC           |
| JR198    | TCCTTATTCGTGCGACCATCTTTCCTCAGTCCCTTCCTG          |
| JR199    | GGAAAGATGGTTCGACGAATAAGGAATAAATCCTAGTTAGTAGGG    |
| JR200    | CGCGGAATTTCCAAGACTCAACCTCTTTCACTC                |
| JR249    | GCGCCTGCAGAAAAAATTATTGTACGCGGTGGAAAAC            |
| JR250    | GCGCGGTACCGCAATAAAGACGCTAAGTTTGTTACATCG          |
| JR253    | GCGCTCTAGAAAAGGCATCCATTTCAATAGACGAG              |
| JR254    | GCGCGGTACCTCTTTTTCCGTATCCATTTGCTG                |
| JR255    | GCGCTCTAGATTCAAAAGATCAAACAATGTTTTACAAC           |
| JR256    | GCGCGGTACCTTCTACCAATTTTCGTTATTTTTTCAG            |
| JR257    | GCGCCTGCAGGGAAAAAATTATTGTACGCGGTGGAAAAC          |
| JR264    | GCGCAGATCTGGCAAATACAGCATTGAACTATGTG              |
| JR265    | GCGCGGATCCAATCGAAGCACCTCATTCCTTC                 |
| JR266    | GCGCGGATCCATGAGAATAATGGGTTTAGATGTCGGC            |
| JR267    | GCGCGTCGACGCTAGGAATGTAGCAAGGATTTCTTC             |
| SHW815   | GATCTATCGATGCATGCCATGGGCTAAATGACCAAGGAATTACCG    |
| SHW816   | CGCGTCGGGCGATATCGGATCCTTCTTCCGCGTTTTGGTAACG      |
| SHW817   | CAATCATCATTTTTAAAAGCACCTCACTATTTTTTCAG           |
| SHW818   | TGCTTTTTAAAATGATGATTGGTAAGCGATTAAGC              |
| SHW819   | GATCTATCGATGCATGCCATGGAGATAGAGGCAGAATAAGACATC    |
| SHW820   | CGCGTCGGGCGATATCGGATCCGGTATTTACAACCACTACGTCG     |
| SHW821   | CGTTCTTATTTTCATGAAGCATCCCTCCCTTTC                |
| SHW822   | TGCTTCATGAAATAAGAACGGAGGAAATGTGCTG               |
| SHW830   | GCGCGCTCTAGATGGACGATTTACGCAAAGAGCTCAG            |
| SHW831   | GCGCGCGGTACCTTAGCTTTTACTTTTTTAGAGGTTGTTTTTC      |
| SHW832   | GCGCGCTCTAGAAATTTCAAACAGTAATTGAACAACTAGC         |
| SHW833   | GCGCGCGGTACCCCTTTTAAAGCCAGATTTATTAATGATAATATC    |
| SW77     | GTA AACATTGCTTGATCTTTTGAATCCATGGGTTTCAC          |
| SW78     | GATCAAGCAATGTTTTACAACCTTCGGCGATGATTC             |
| SW110    | GCGCGCGGATCCATGCATGCAGAATTTAGAACAGATAG           |
| SW111    | GCGCGCGTCGACTCATGAAGCATCCCTCCCTTTC               |
| SW112    | GCGCGCGGATCCATGATGATTGGTAAGCGATTAAGCG            |
| SW113    | GCGCGCGTCGACTTAATTTGGATAAGGGACTGTACCTTC          |
| SW136    | CTAAACGAGCTATCATACTTCTAGCATCCTTGTGAC             |
| SW137    | GTATGATAGCTCGTTTAGAACGAGATGAAATTATCGAG           |
| SW138    | AATTTTCATCTGCTTCTAAACGACGTATCATACTTCTAGC         |
| SW139    | GTTTAGAAGCAGATGAAATTATCGAGGAACCTTGTCAAAG         |
| SW144    | CCTTGTGAGCAGGAATATAAGCAGGATCGCCTG                |
| SW145    | TATATTCTGCTCACAAAGGATGCTAGAAGTATGATAC            |
| SW146    | GTATCATACTTGACGATCCTTGTGACGAGGAATATAAG           |
| SW147    | GGATGCTGCAAGTATGATACGTCGTTTAGAACGAG              |
| Lmo1503F | GCTATACCATGGATTCAAAAGATCAAACAATGTTTTACAAC        |
| Lmo1503R | CGATATCTCGAGTCATTTCTCACCAATTTTCGTTATTTTTTCAG     |
| PrkAF    | GCTATACCATGGCAATGATGATTGGTAAGCGATTAAGCG          |
| PrkAR    | CGATATCTCGAGTCATTTTTTCTTTTTCTTATCTTTTTTCTCCTCAGG |
| PrkPF    | GCTATACCATGGCAATGCATGCAGAATTTAGAACAGATAGAG       |
| PrkPR    | CGATATCTCGAGTCATGAAGCATCCCTCCCTTTC               |

1027

1028

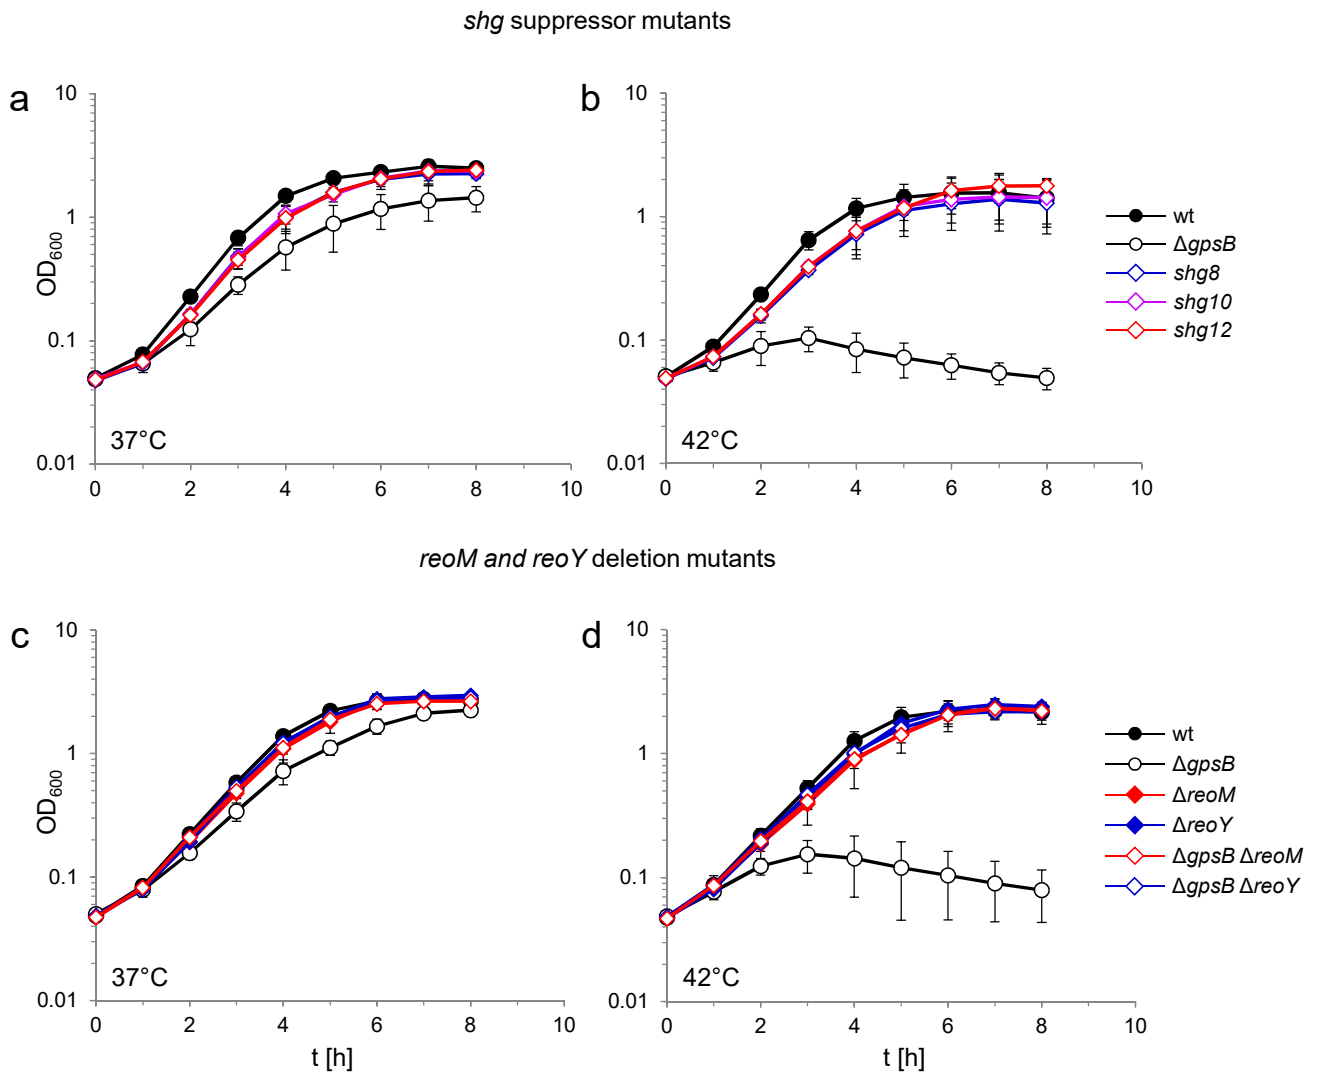

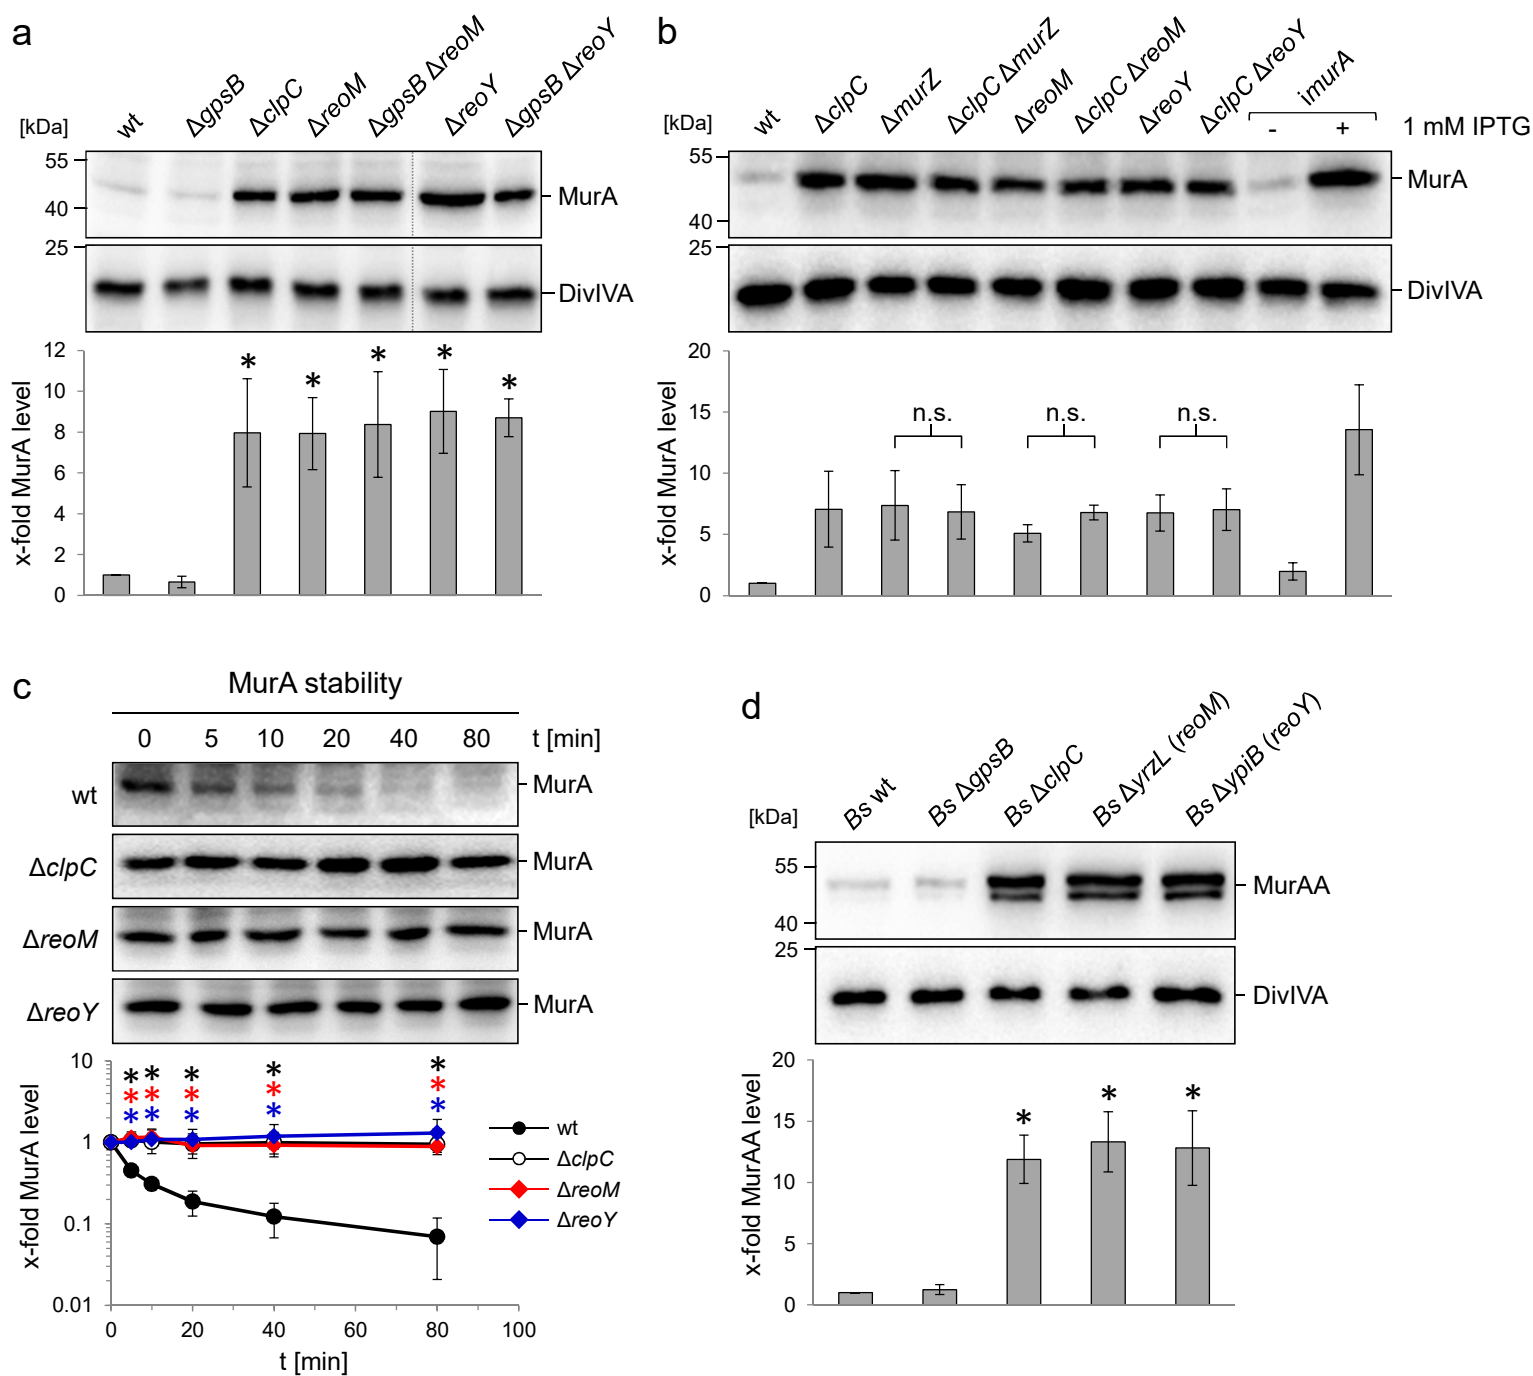



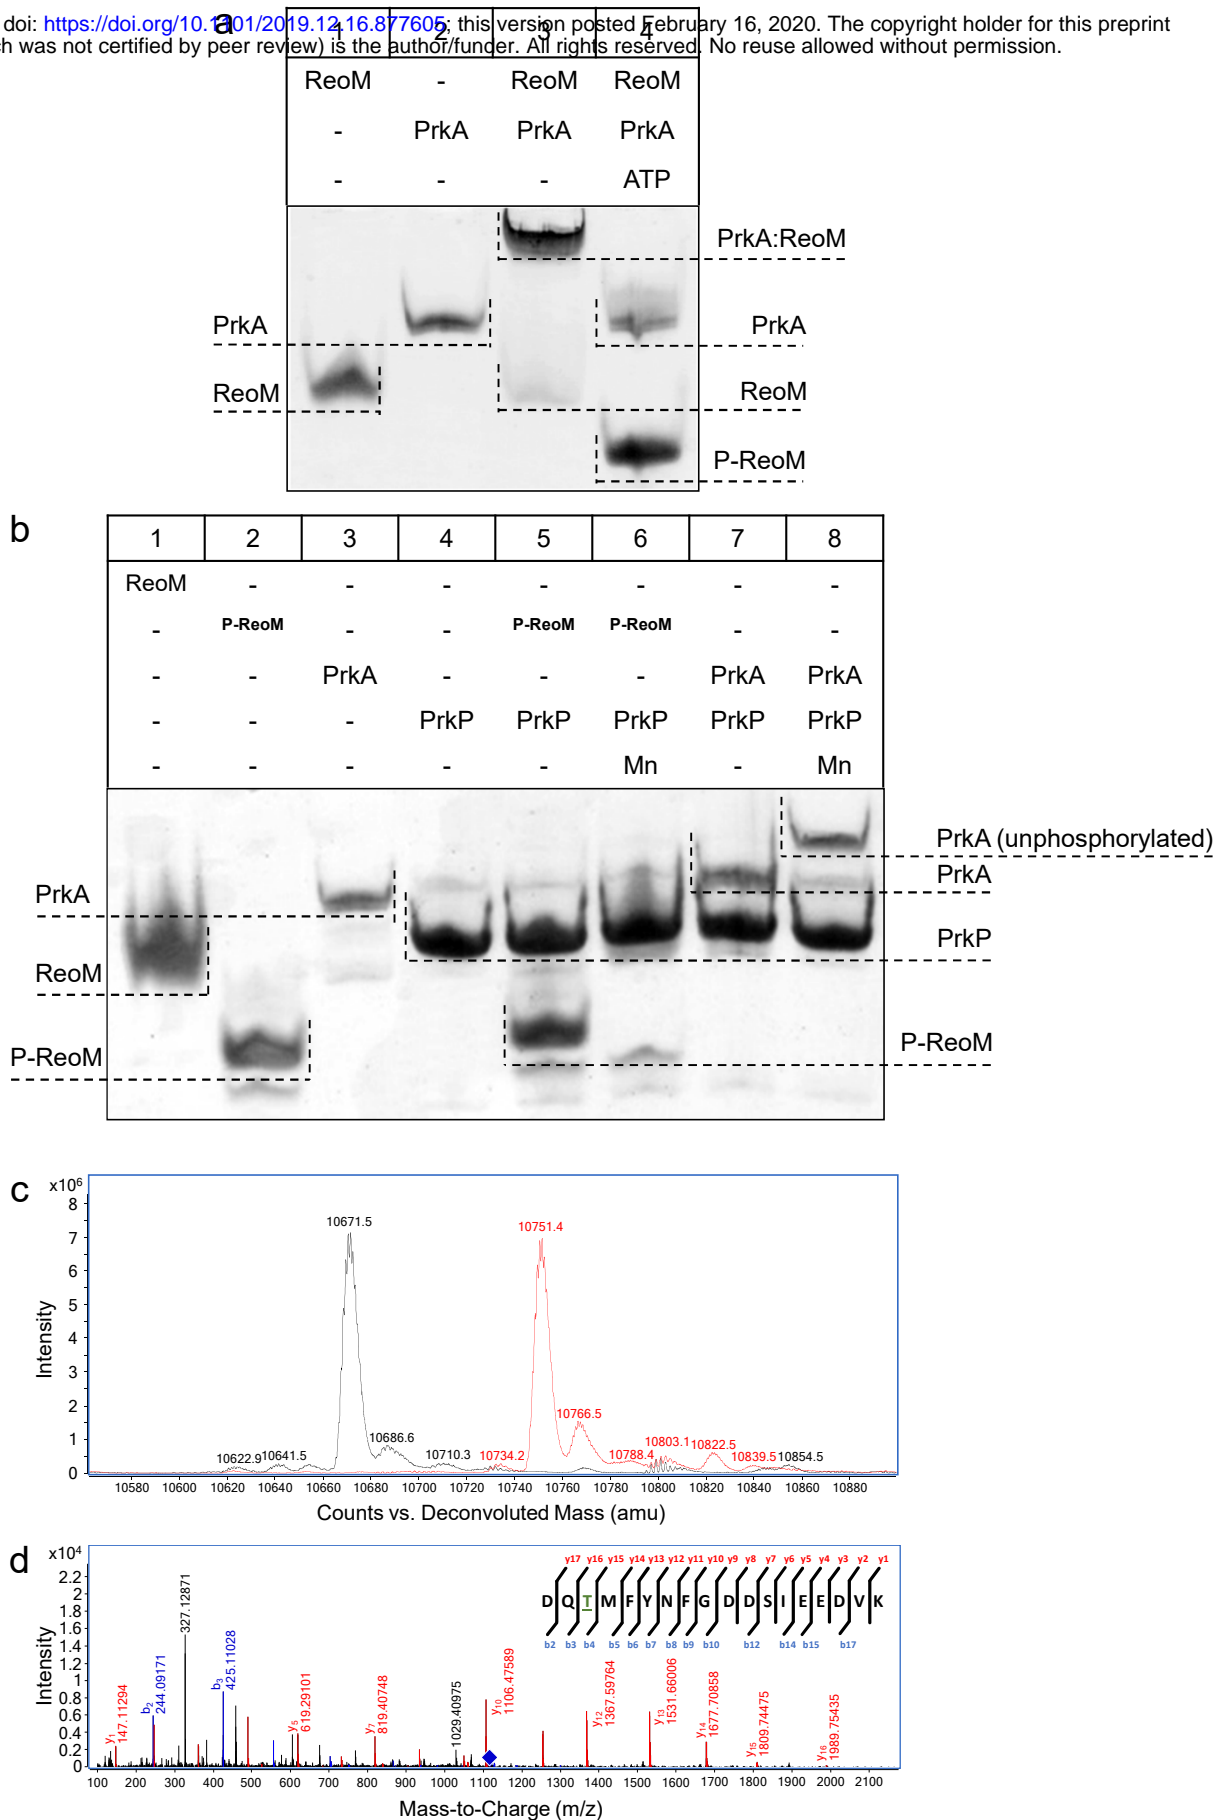

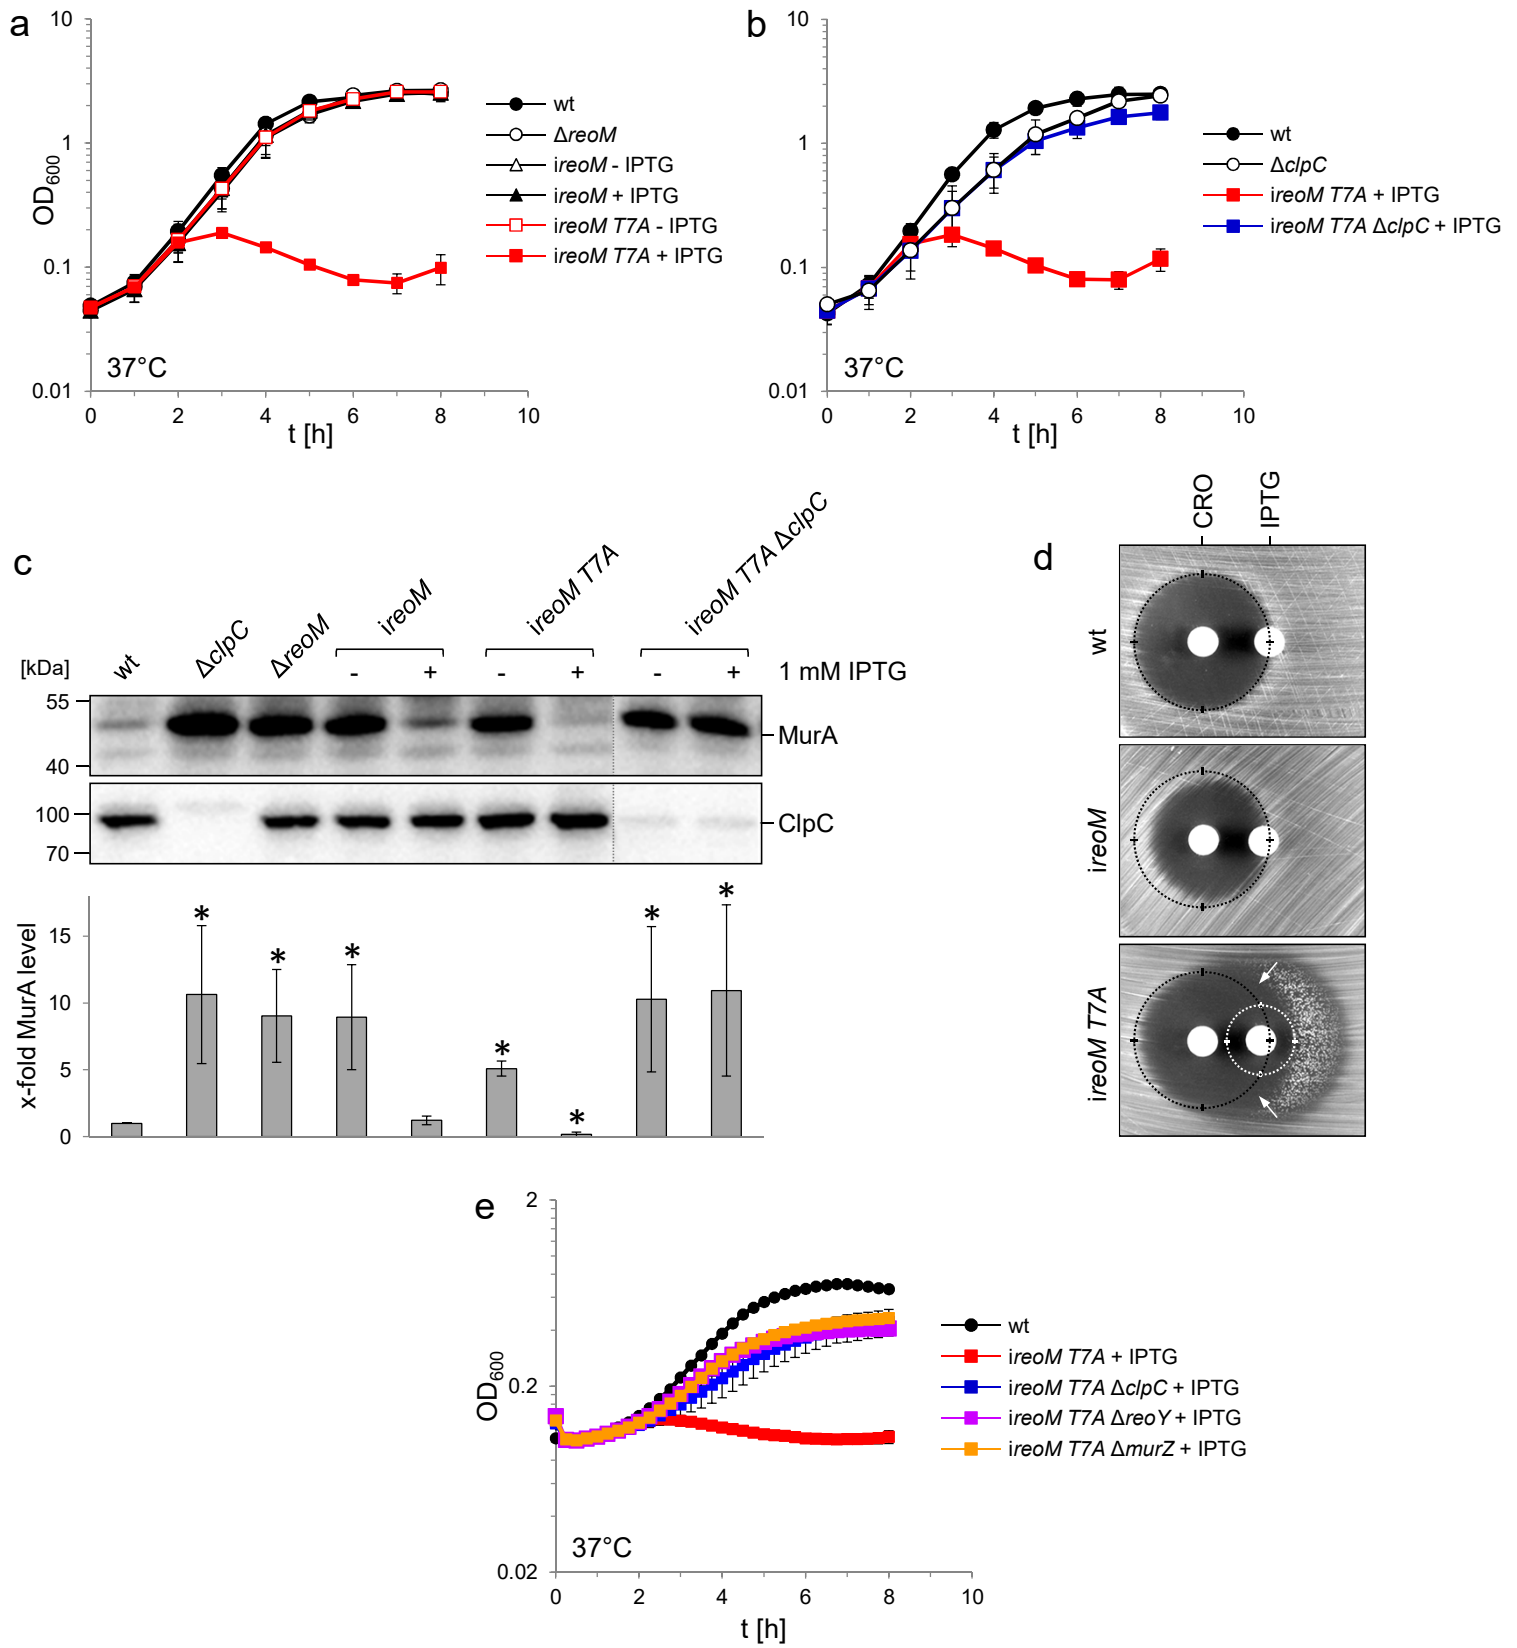

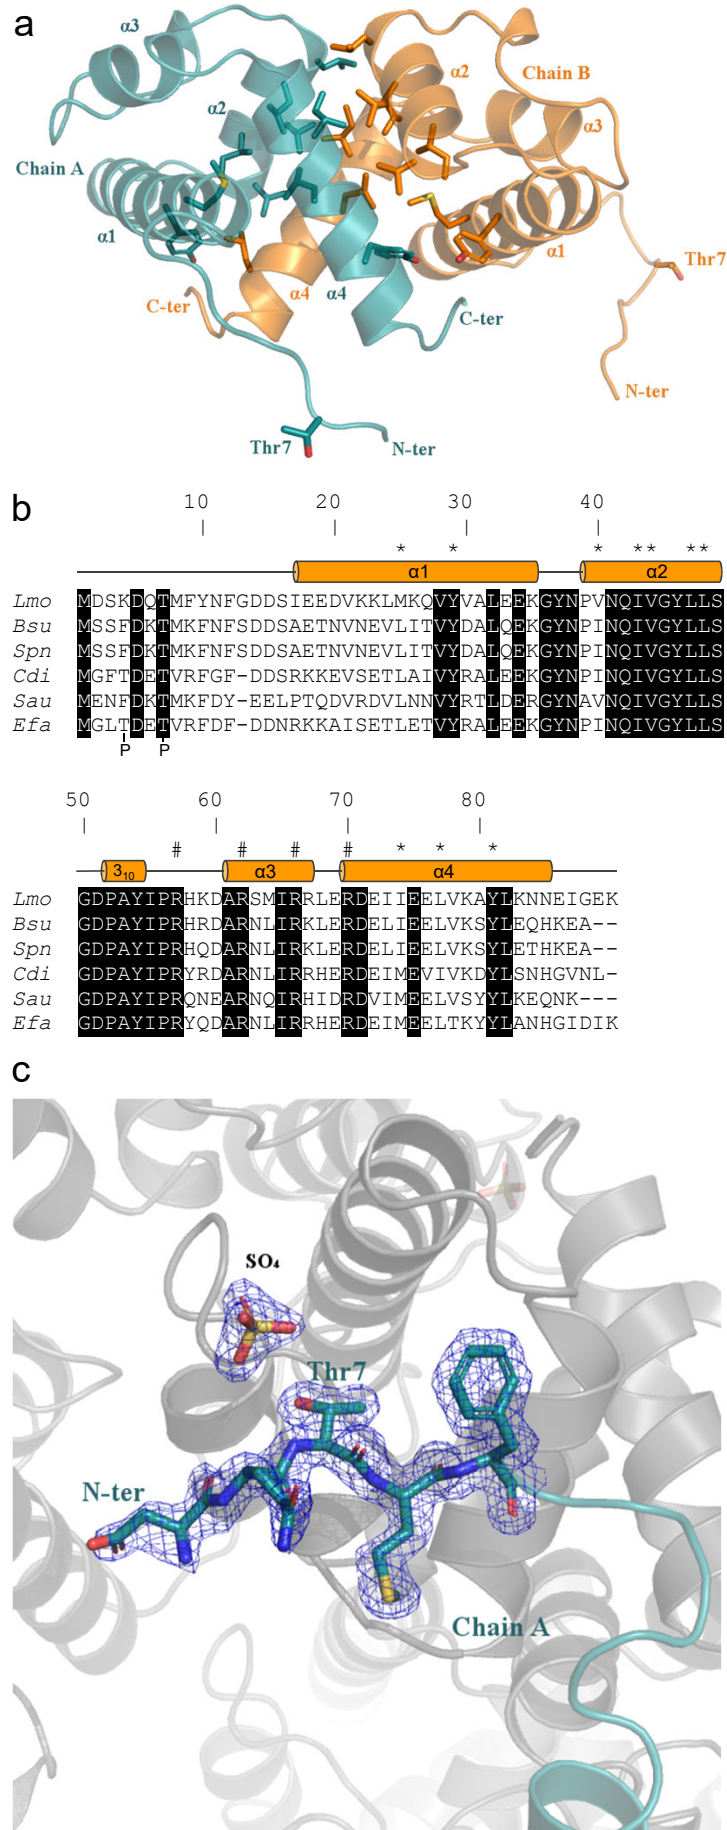

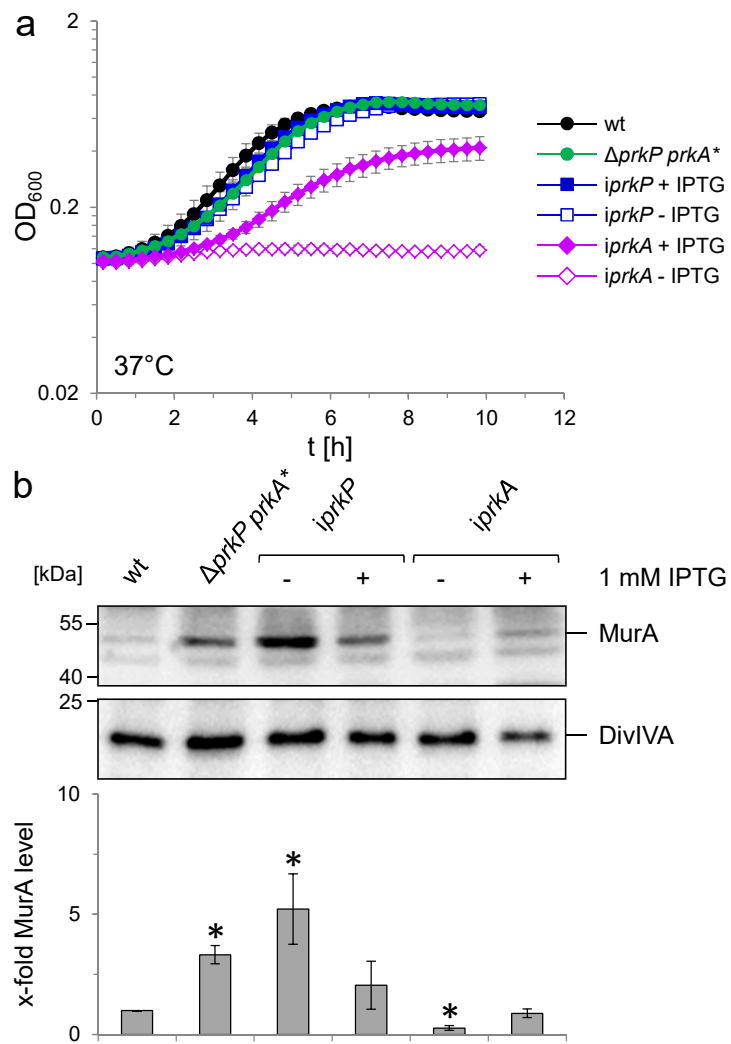

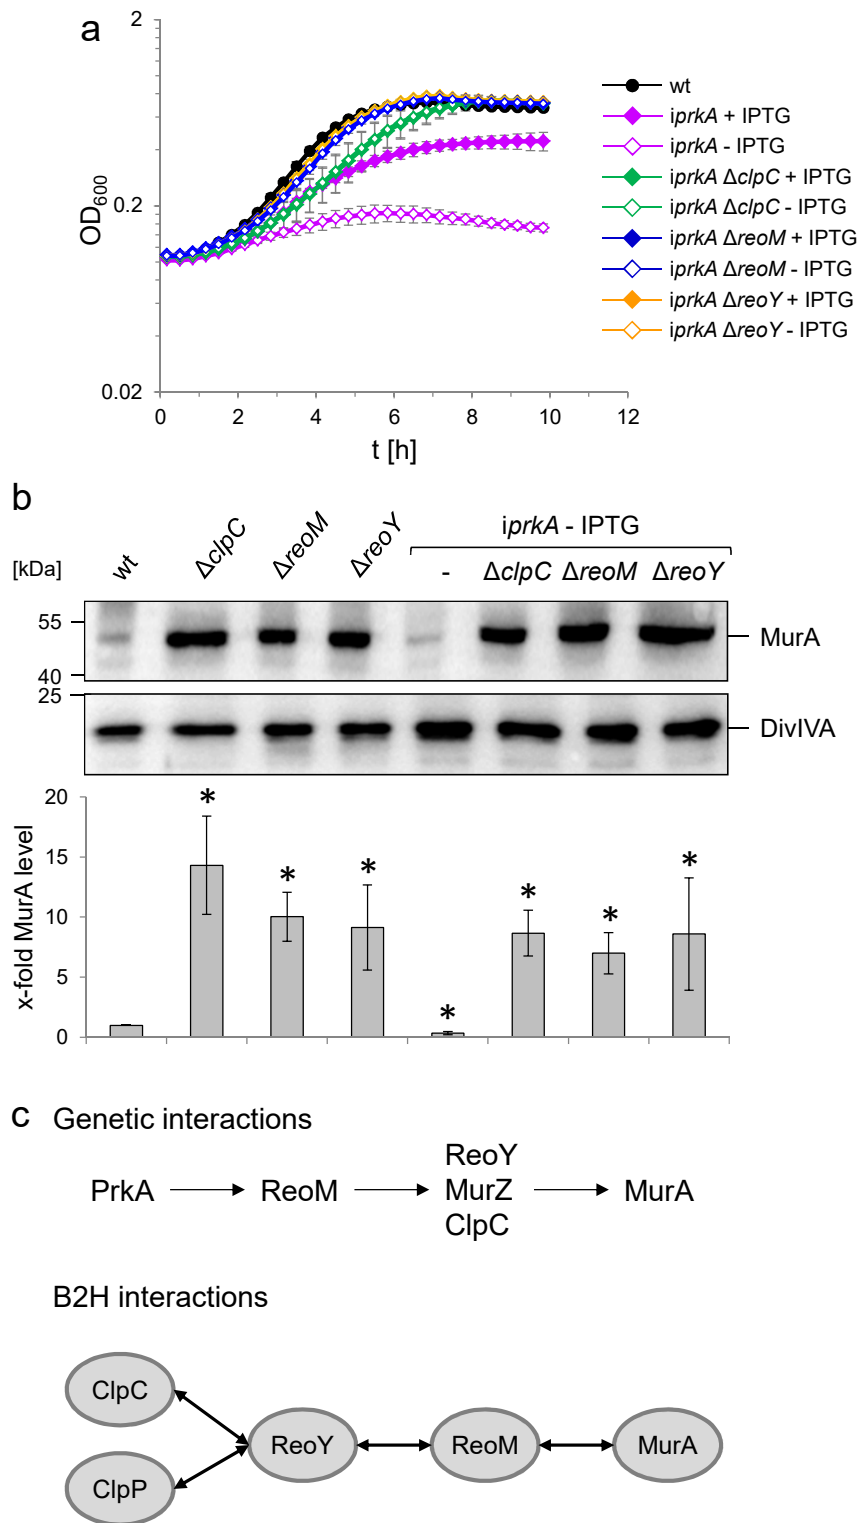

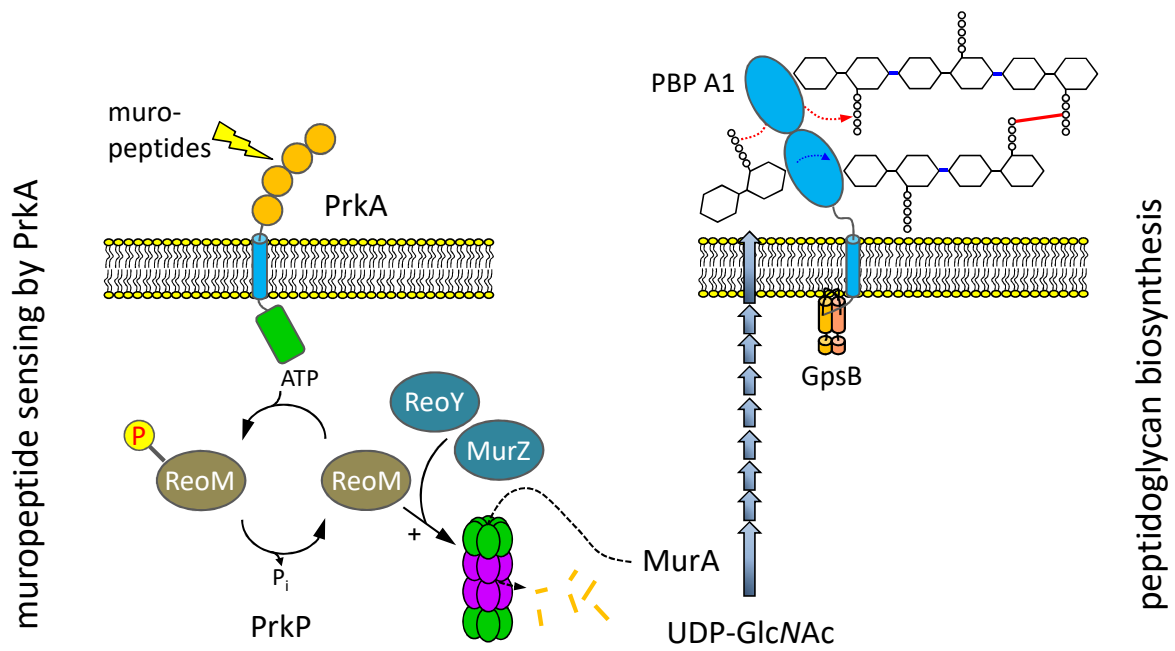

Source: https://www.biorxiv.org/content/biorxiv/early/2020/02/16/2019.12.16.877605.full.pdf
